1 **Mechanotropic bZIP localization is associated with thigmomorphogenic and secondary cell**  
2 **wall associated gene expression**

3

4

5

6 Joshua H. Coomey<sup>1,2</sup>, Kirk J.-M. MacKinnon<sup>1,3</sup>, Ian W. McCahill<sup>1,2</sup>, Bahman Khahani<sup>1,2</sup>, Pubudu  
7 P. Handakumbura<sup>1,2</sup>, Gina M. Trabucco<sup>1,3</sup>, Jessica Mazzola<sup>1</sup>, Nicole A. Leblanc<sup>1</sup>, Rithany  
8 Kheam<sup>1</sup>, Miriam Hernandez-Romero<sup>1,2</sup>, Kerrie Barry<sup>4</sup>, Lifeng Liu<sup>4</sup>, Ji E. Lee<sup>4</sup>, John P. Vogel<sup>4</sup>,  
9 Ronan C. O'Malley<sup>4</sup>, James J. Chambers<sup>5</sup>, Samuel P. Hazen<sup>1,2,3</sup>

10

11

12 <sup>1</sup>Biology Department, University of Massachusetts, Amherst, MA 01003, USA,

13 <sup>2</sup>Plant Biology Graduate Program, University of Massachusetts, Amherst, MA 01003, USA,

14 <sup>3</sup>Molecular and Cellular Biology Graduate Program, University of Massachusetts, Amherst, MA  
15 01003, USA,

16 <sup>4</sup>DOE Joint Genome Institute, Berkeley, CA 94720, USA,

17 <sup>5</sup>Institute for Applied Life Science, University of Massachusetts, Amherst, MA 01003, USA,

18 Author for correspondence:

19 Samuel P. Hazen, [hazensam@umass.edu](mailto:hazensam@umass.edu)

20

21 **ORCID**

22 Joshua H. Coomey, <https://orcid.org/0000-0001-5866-6671>

23 Kirk J.-M. MacKinnon, <https://orcid.org/0000-0001-9698-3985>

24 Bahman Khahani, <https://orcid.org/0000-0003-4499-2825>

25 Pubudu P. Handakumbura, <https://orcid.org/0000-0002-1708-8315>

26 Kerrie Barry, <https://orcid.org/0000-0002-8999-6785>

27 Ji E. Lee, <https://orcid.org/0000-0001-8325-1689>

28 John P. Vogel, <https://orcid.org/0000-0003-1786-2689>

29 James J. Chambers, <https://orcid.org/0000-0003-3883-8215>

30 Samuel P. Hazen, <https://orcid.org/0000-0001-9131-8994>

31

32 **AUTHOR CONTRIBUTIONS**

33 JC, IM, and SH conceived and designed the study. JC, IM, PH, GT, MH-R, JV, RO developed  
34 techniques and reagents. JC, IM, JM, NL, RK, KB, LL, JL, JV. and RO acquired the data. JC,  
35 KM, IM, BK, and SH analyzed and interpreted the data. JC, KM, IM, and SH drafted the  
36 manuscript. SH agrees to serve as the author responsible for contact and ensures communication.

## 37 Abstract

38

39 Plant growth is mediated by the integration of internal and external cues, perceived by cells and  
40 transduced into a developmental program that gives rise to cell division, elongation, and wall  
41 thickening. Extra-, inter-, and intra- physical cellular forces contribute to this regulation. Across  
42 the plant kingdom thigmomorphogenesis is widely observed to alter plant morphology by  
43 reducing stem height and increasing stem diameter. The root transcriptome is highly responsive  
44 to touch, including components of calcium signaling pathways and cell wall modification. Here,  
45 we present data on a mechanotropic bZIP transcription factor involved in this process in grasses.  
46 *Brachypodium distachyon* SECONDARY WALL INTERACTING bZIP (SWIZ) protein  
47 translocated into the nucleus in response to mechanical stimulation. Misregulation of *SWIZ*  
48 expression resulted in plants with reduced stem and root elongation, and following mechanical  
49 stimulation, increased secondary wall thickness. Classical touch responsive genes were  
50 upregulated in *B. distachyon* roots following touch, and we observe significant induction of the  
51 glycoside hydrolase 17 family, which may be indicative of a facet of grass  
52 thigmomorphogenesis. SWIZ protein binding to an E-box variant in exons and introns was  
53 associated with immediate activation followed by repression of gene expression. Thus, SWIZ is  
54 a transcriptional regulatory component of thigmomorphogenesis, which includes the thickening  
55 of secondary cell walls.

56

## 57 INTRODUCTION

58 Forces both internal and external to a cell influence growth. Turgor pressure in conjunction with  
59 anisotropic cell wall dynamics determine direction of growth and thus cell shape. Force  
60 perception between neighboring cells plays a critical role in the development and maintenance of  
61 tissue form and function, such as the lobed, interlocking, pavement cells on the leaf epidermis, or  
62 the developmental hotspots in the apical meristem (Hamant et al., 2008; Uyttewaal et al., 2012;  
63 Bidhendi et al., 2019). Specific inter-cell forces result in dynamic remodeling of the cortical  
64 cytoskeleton, with subsequent changes in cellulose microfibril alignment and alterations to other  
65 cell wall components such as pectin methyl esterification (Hamant et al., 2008; Uyttewaal et al.,  
66 2012; Bidhendi and Geitmann, 2018; Altartouri et al., 2019; Bidhendi et al., 2019). The classic  
67 hallmarks of touch responsive growth, or thigmomorphogenesis, include reduced plant height,  
68 increased radial growth in plants with a cambial meristem, increased branching, and delayed  
69 flowering time (Jaffe, 1973; Biro et al., 1980; Jaffe et al., 1980; Braam, 2004). These attributes  
70 have been leveraged by farmers for hundreds of years. As early as 1680 records show Japanese  
71 farmers tread on young wheat and barley seedlings to elicit increased branching, spikes per plant,  
72 and grain weight per plant, along with stronger roots (Iida, 2014). This practice, known as  
73 mugifumi, continues today with mechanized rollers. Thigmomorphogenesis in belowground  
74 tissues have also been studied to some extent, with the impact of stiffer substrates eliciting  
75 changes in root length and straightness, with the implication of hormonal signaling pathways in  
76 mediating this response (Lourenço et al., 2015; Lee et al., 2019; Nam et al., 2020). The known

77 touch responsive mutants in *A. thaliana* have more skewed roots than wild type when grown on  
78 stiff inclined media (Zha et al., 2016).

79 Calcium is a critical cellular signaling molecule, and cytosolic Ca<sup>2+</sup> fluctuations are induced by  
80 mechanical stimuli and implicated in mechanosignaling (Monshausen et al., 2009; Szczegieliński  
81 et al., 2012). Mechanical stimulus can significantly remodel gene expression (Braam and Davis,  
82 1990; Braam, 2004; Lee et al., 2005). The so-called *TOUCH (TCH)* genes in *Arabidopsis*  
83 *thaliana*, encode calmodulin (*AtTCH1/AtCaM2*), calmodulin-like proteins (*AtTCH2/AtCML24*,  
84 *AtTCH3/CML12*), and a xyloglucan endotransglucosylase/hydrolase (*AtTCH4/AtXTH22*) (Braam  
85 and Davis, 1990). Touch responsive gene expression patterns often overlap with other stimuli  
86 such as dark, cold, and hormone treatment (Polisensky and Braam, 1996; Lee et al., 2005). In  
87 addition to calcium binding and signaling, genes related to cell wall modification and a variety of  
88 transcription factors and kinases are regulated by mechanical stimulus, as well as genes involved  
89 in hormone homeostasis and signaling.

90 Group I bZIPs are also implicated in mechanosensing. VIRE2-INTERACTING PROTEIN 1  
91 (*AtVIP1*) and related Group I bZIP proteins translocate from the cytoplasm to the nucleus in  
92 response to a variety of biotic and abiotic stimuli, including hypo-osmotic conditions (Tsunami  
93 et al., 2012; Tsunami et al., 2014; Tsunami et al., 2016). This translocation appears to be  
94 dependent on protein phosphorylation, either from MITOGEN ACTIVATED PROTEIN  
95 KINASE 3 during pathogen invasion, or via calcium dependent protein kinases (CDPK). *AtVIP1*  
96 interacts with calmodulins, the calcium binding proteins involved in many calcium signaling  
97 events. The Group I bZIP *Nt REPRESSOR OF SHOOT GROWTH (NtRSG)* in tobacco plays a  
98 role in maintaining GA homeostasis, wherein it translocates from the cytoplasm to the nucleus in  
99 response to cellular bioactive GA levels (Igarashi et al., 2001; Ishida et al., 2008; Fukazawa et  
100 al., 2010). Under standard conditions, *NtRSG* is largely localized in the cytoplasm, and to some  
101 extent in the nucleus, where it directly activates expression of *NtEnt-kaurene oxidase*, an enzyme  
102 at an early step in the GA biosynthesis pathway. After cellular GAs were chemically inhibited,  
103 *NtRSG* translocated to the nucleus and also activated *NtGA20oxidase1 (NtGA20ox1)*, an enzyme  
104 further downstream in the GA biosynthesis pathway that is in part responsible for converting GA  
105 species to their bioactive form (Fukazawa et al., 2010; Fukazawa et al., 2011). This suggests that  
106 nuclear-localized *NtRSG* acts to promote bioactive GA synthesis in response to low GA  
107 conditions. As with *AtVIP1*, *NtRSG* translocation relies on CDPK mediated phosphorylation  
108 (Ishida et al., 2008; Ito et al., 2017). Both *AtVIP1* and *NtRSG* associate with 14-3-3 proteins in  
109 the cytoplasm while phosphorylated (Ishida et al., 2004; Ito et al., 2014; Ito et al., 2017;  
110 Tsunami et al., 2018). Phosphatase activity causes *NtRSG* and the related *AtbZIP29* to  
111 dissociate from the 14-3-3 protein and enter the nucleus (Van Leene et al., 2016). *NtRSG* is  
112 named for the dwarf phenotype observed when a dominant negative form of the protein is  
113 overexpressed. In these dwarf plants, there were reduced levels of bioactive GA and reduced  
114 elongation of stem internode cells (Fukazawa et al., 2000).

115 The development of secondary cell walls is a distinct and critical developmental process in plant  
116 growth. Following cellular elongation, some cells, particularly in vascular and structural tissues,  
117 increase their mechanical strength by depositing a thick layer of rigid material between the  
118 plasma membrane and primary cell wall. These secondary walls are made of crystalline cellulose  
119 interwoven with hemicelluloses and phenolic lignin polymers. Although functionally similar,  
120 secondary walls in monocotyledonous plants have key differences from those in eudicots,  
121 including distinct hemicellulose chemistry and differences in lignin biosynthesis. Grasses also  
122 produce mixed-linkage glucans (MLGs), a wall polysaccharide that is rarely found outside the  
123 commelinid monocots (Coomey et al., 2020). The synthesis and deposition of secondary wall  
124 polymers is tightly controlled spatially and temporally by a well defined transcriptional  
125 regulatory network. Evidence in both eudicots and grasses suggest a system of feed-forward  
126 loops regulating transcription of wall synthesizing enzymes, with NAC family transcription  
127 factors activating wall synthesis genes as well as MYB family and other transcription factors that  
128 further promote secondary wall synthesis (McCahill and Hazen, 2019). These networks are very  
129 similar between grasses and eudicots, with some components in each that have yet to be  
130 described in the other (Coomey et al., 2020). There are currently no bZIP family members in any  
131 secondary wall regulatory model.

132 Beyond differences at the chemical and regulatory levels, grasses employ a fundamentally  
133 different growth mechanism than eudicots. Grasses do not have a cambium layer, and thus no  
134 lateral meristem. Stem elongation comes from cellular division and elongation in a discrete series  
135 of intercalary meristems, called nodes, with one internode region elongating and pushing up  
136 subsequent nodes. Detailed studies of thigmomorphogenesis have been conducted almost  
137 exclusively in eudicots. However, recent work in the model cereal grass *Brachypodium*  
138 *distachyon* shows general overlap with conventional dicot thigmomorphogenesis, albeit with  
139 some notable differences, such as no change in stem diameter and increased time to flower  
140 (Gladala-Kostarz et al., 2020).

141 Thigmomorphogenesis is a widely observed phenomenon that results in reduced height,  
142 increased radial growth, and increased branching. The mechanisms behind this form of growth  
143 are not yet fully understood, but involve aspects of hormone regulation, Ca<sup>2+</sup> signaling, Group I  
144 bZIP intracellular translocation, and changes in gene expression. Here we describe the  
145 transcriptional response to mechanical stimulation and the function of a *B. distachyon* bZIP  
146 transcription factor, SECONDARY WALL ASSOCIATED bZIP (Bradi1g17700) and its role in  
147 touch response and cell wall biosynthesis.

## 148 RESULTS

149

### 150 SWIZ is a Group I bZIP transcription factor and candidate cell wall regulator

151 To identify genes involved in the regulation of secondary cell wall thickening, transcript  
152 abundance was measured in *B. distachyon* leaf, root, and stem tissue (Trabucco et al., 2013). A  
153 gene annotated as a bZIP transcription factor, Bradi1g17700, was highly expressed in root and

154 stem relative to leaf (**Fig 1A**). Bradi1g17700 is also a member of a 112 gene coexpression  
155 network (**Supplemental Table S1**) that includes genes highly expressed in the peduncle (Sibout  
156 et al., 2017). Phylogenetic analysis of Bradi1g17700, hereinafter referred to as *SECONDARY*  
157 *WALL INTERACTING bZIP* (*SWIZ*), amino acid sequence shows it to be an ortholog of the *A.*  
158 *thaliana* Group I bZIPs (Jakoby et al., 2002; Dröge-Laser et al., 2018), and closely related to  
159 *AtbZIP18* and *AtbZIP52* (**Fig 1B, File S1**).

160

### 161 **SWIZ translocates into the nucleus in response to mechanical stimulus**

162 Group I bZIPs in *A. thaliana* have been described as playing intersectional roles in regulating  
163 growth and development, and in doing so display dynamic translocation between the cytosol and  
164 the nucleus in response to external cellular force. As an ortholog of these mechanotropic  
165 proteins, we hypothesized that SWIZ protein may similarly translocate within the cell in  
166 response to mechanical force and contribute to plant growth regulation. To test this, the roots of  
167 transgenic plants overexpressing either *SWIZ* fused to *GFP* (*SWIZ:GFP-OE*) or *GFP* alone  
168 (*GFP-OE*) were observed following a mechanical stimulus (**Fig 2A**). In control plants, GFP  
169 signal was present in both the cytosol and nucleus, which remained constant over the imaging  
170 period (**Fig 2B**). GFP signal was mostly observed in the cytosol in *SWIZ:GFP-OE* plants, but  
171 following mechanical stimulus, nuclear GFP signal increased substantially, reaching a peak  
172 around 30 min post stimulus and returned to near basal levels by about 60 min, while untouched  
173 plants showed no change in signal localization (**Fig 2B**).

174 The dynamics and repeatability of SWIZ nuclear translocation were further investigated by  
175 sequential stimulus treatments. Touch response to stimulus can saturate at a certain number of  
176 treatments (Martin et al., 2010; Leblanc-Fournier et al., 2014; Moulia et al., 2015). To test if  
177 SWIZ translocation dynamics varied after repeated treatments, we applied mechanical force to  
178 *SWIZ:GFP-OE* roots at regular intervals. A second stimulus was given 90 min after the first, and  
179 a third at 180 min. Following each mechanical stimulation, SWIZ consistently translocated from  
180 cytoplasm to nucleus (**Fig 2D**). This suggests that SWIZ translocation dynamics are not impacted  
181 by repeated stimulus events 90 min apart.

182 When conducting these translocation assays, root tissue in the field of view was treated with  
183 mechanical force and nuclei in that region were tracked and quantified for fluorescence. To  
184 determine if the signal triggering SWIZ translocation is spread beyond the specifically stimulated  
185 region, two regions of the same *SWIZ:GFP-OE* root separated by 3 cm were simultaneously  
186 observed. The stimulated region showed typical SWIZ:GFP nuclear signal accumulation and in  
187 the region below no translocation was observed (**Fig 2C**). At 120 min, the treatments were  
188 reversed, with the lower root region receiving a stimulus while the upper region was  
189 unperturbed. The lower region showed SWIZ:GFP nuclear translocation while the upper region  
190 did not. Thus, the touch stimulus perceived by SWIZ is localized directly to the perturbed region.

### 191 **Transcriptional response to touch**

192 Having established the nuclear translocation of SWIZ in response to touch, we then investigated  
193 what effect touch and SWIZ overabundance during touch may have on gene expression. To  
194 assess this, we measured transcript abundance by sequencing mRNA from wildtype and *SWIZ-*  
195 *OE* root tissue just prior to touch (0 min) and at 10, 30, and 60 min following touch treatment  
196 (**Fig 3A**). Principal component analysis of transcript abundance shows the greatest amount of  
197 variance is attributed to the first principal component, 60%, where samples cluster based on  
198 genotype (**Fig 3B**). The second principal component, which accounts for 17% of the variance,  
199 distinguished between pre-touch and 10 min following touch, with the last two time points  
200 clustering similarly.

201  
202 The wildtype transcriptome was massively remodeled in response to touch, with 8,902  
203 transcripts differentially expressed ( $q < 0.1$ ) at 10 min post touch, 5,682 transcripts at 30 min,  
204 and 7,672 transcripts at 60 min (**Supplemental Tables 2-4**). Touch response studies in *A.*  
205 *thaliana* describe similar changes that include numerous calmodulin (CAM), calmodulin-like  
206 (CmL), and xyloglucan endo-transglycosylase/hydrolase (XTH) activity (**Fig 3C**) (Braam and  
207 Davis, 1990; Lee et al., 2005). Based on homology with *TCH1*, *TCH2*, and *TCH3*, 79 CAM and  
208 CmL genes were identified, the majority of which showed upregulation in wildtype plants  
209 following touch treatment (**Supplemental Table 5**). Similarly, homology with *TCH4* identified  
210 37 *B. distachyon* *XTH* and *XTH-like* genes. Of these, 8 genes were upregulated by touch in  
211 wildtype plants, including the two with the highest similarity to *TCH4* (Bradi1g33810 and  
212 Bradi33840) (**Fig 3C, Supplemental Table 6**). Since xyloglucans are in relatively low  
213 abundance in grass cell walls compared to eudicots, we also investigated the effect of touch on  
214 other families of the glycosyl hydrolase superfamily (Tyler et al., 2010). In particular, GH17  
215 genes were differentially regulated following touch. The GH17 family is broadly described as  
216 modifying  $\beta$ -1,3-glucans. We observed measurable transcript abundance for 35 of the 53  
217 annotated GH17 family members, with 8, 11, and 16 members showing differential expression at  
218 10, 30 and 60 min respectively. Fisher's exact test determined significant enrichment of GH17  
219 expression at time 60 ( $p = 9.307e-3$ ) (**Fig 3C, Supplemental Table 7**). Online resources are  
220 available to explore the RNA-seq data at (<https://hazenlab.shinyapps.io/swiztc/>), which provides  
221 an interactive platform for interrogating the *B. distachyon* touched-root transcriptome.

### 222 223 **Cell wall genes are downregulated immediately following touch, then induced concurrent** 224 **with SWIZ nuclear translocation and more strongly in SWIZ-OE**

225 Genes related to secondary cell wall synthesis were immediately downregulated in wildtype  
226 plants following touch, but were subsequently upregulated (**Fig 4**). Xylan, cellulose, MLG, and  
227 callose synthesis associated genes were upregulated 30 and 60 min following touch, while lignin  
228 biosynthesis and BAHD acyltransferase genes were upregulated at 60 min. Network analysis of  
229 gene expression patterns over time using the iDREM software showed that in *SWIZ-OE* plants,  
230 cell wall genes were more rapidly induced (**Supplemental Fig 2A-B**). Prior to touch, nearly all  
231 of the cell wall associated genes investigated were significantly downregulated relative to

232 wildtype, then significantly upregulated following touch (**Fig 4**). In *SWIZ-OE*, cell wall related  
233 terms were enriched in paths that had stronger upregulation earlier than the same terms in  
234 wildtype (**Supplemental Fig 2A-B**). Notably, aspects of cell wall polysaccharide biosynthesis,  
235 particularly glucan biosynthesis, were significantly enriched in *SWIZ-OE* path D, while not  
236 significantly enriched in wildtype (**Supplemental Table 8**). This is mirrored when looking at  
237 specific gene expression, with primary wall associated CESAs, MLG, and callose synthesis  
238 genes all significantly upregulated following touch in *SWIZ-OE*. Thus, cell wall genes were  
239 immediately repressed by touch, followed by significant activation. That activation occurs more  
240 rapidly in *SWIZ-OE* plants and is associated with the timing of SWIZ protein nuclear  
241 translocation.

242

### 243 **SWIZ protein binding in the gene body is associated with dynamic changes in gene** 244 **expression**

245 Next we investigated the direct binding targets of SWIZ protein by performing DNA affinity  
246 purification sequencing (DAP-seq) with whole genomic DNA. In total, SWIZ interacted with  
247 2,455 distinct positions in the genome (**Supplemental Table S9**). Those regions were  
248 significantly enriched for two sequence motifs, (A/C)CAGNCTG(T/G) and  
249 (A/C)CAGCTG(T/G) that are variants of the E-box motif (**Fig 5A**). A plurality of the binding  
250 sites were between the translational start and stop sites with 21% of the peaks in introns and 21%  
251 in exons (**Fig 5B**). Fewer than 10% of the peaks occurred in UTRs and the promoter (defined as  
252 5 kb upstream of the 5' UTR) and intergenic regions each accounted for 25% of the binding  
253 sites. Thus, SWIZ protein is preferentially bound to an E-box like motif and often in the gene  
254 body (**Fig 5C**).

255

256 To investigate the effects of possible SWIZ binding on gene expression, we compared the genes  
257 differentially expressed in the *SWIZ-OE* touch response RNA-seq time courses with the promoter  
258 and gene body binding targets identified by the DAP-seq assay. Prior to touch, genes with  
259 promoter-SWIZ protein interactions were most often downregulated in *SWIZ-OE* relative to  
260 wildtype (**Table 1**). However, some SWIZ targets behaved differently following touch. SWIZ  
261 promoter binding targets were most often upregulated in *SWIZ-OE* in all three post-touch time  
262 points. Thus, SWIZ promoter binding was coincident with repression, but following a touch  
263 stimulus, activation was more prominent. However, this difference between untreated and  
264 touched was not as pronounced in gene body targets, with more upregulated genes 10 min  
265 following touch and more downregulated 30 and 60 min following touch. To further explore  
266 these trends we conducted iDREM cluster analysis of the differentially expressed genes that  
267 were also SWIZ protein targets (**Fig 5D**). For both wildtype and *SWIZ-OE*, the network analysis  
268 revealed a pathway to increased gene expression by 60 min following touch. The network  
269 pathway trend for both promoter and gene binding targets in wildtype was immediate repression  
270 at 10 min followed by increased expression at 30 and 60 min post-stimulus. A unique pathway  
271 was observed among gene body binding targets in *SWIZ-OE*; transcript abundance was reduced

272 following touch. Thus, SWIZ binding to a promoter or gene body was more strongly associated  
273 with increased expression with the exception of gene body targets in touched *SWIZ-OE* plants,  
274 which were more strongly repressed.

275  
276 Among the genes differentially expressed in response to both touch, *SWIZ-OE* transgene, and  
277 bound by SWIZ in the first intron is the mixed glucan synthase *CSLF6* (**Fig 6A**). The transcript  
278 abundance of *GA2ox3*, which inactivates bioactive GA, was bound by SWIZ protein in both the  
279 gene body and 3'UTR and expression significantly increased 30 min after touch in *SWIZ-OE*  
280 (**Fig 6B**). An example of gene body binding repression is *SWAM3* (Bradi1g30252), the closest  
281 ortholog to a wheat transcription factor induced by hypoxia, *TaMYB1* (Lee et al., 2006;  
282 Handakumbura et al., 2018). This gene was touch induced in wildtype and repressed in *SWIZ-OE*  
283 with a binding site in the 5'UTR (**Fig 6C**). A membrane-associated transcription factor, *NAC35*,  
284 exhibited a similar expression to *SWAM3* (Handakumbura et al., 2018) and SWIZ bound the  
285 promoter region (**Fig 6D**).

286  
287 ***Cis*-regulatory sequences associated with mechanical stress, wounding, and cell wall**  
288 **synthesis are enriched among touch responsive genes**

289 Genes differentially expressed in wild-type in response to touch were analyzed for enrichment of  
290 putative *cis*-regulatory elements (CREs). We identified several sequences significantly enriched  
291 among touch-responsive transcripts (**Fig 7, Supplemental Fig 6, Supplemental Table S10 and**  
292 **S11**). Several of those have been previously described as touch responsive, including the Rapid  
293 Stress Response Element, the GCC boxes AGCCGCC and GCCGCC, a sequence referred to as  
294 both the E-box and G-box (CACGTG), CM2, AP2-like, GGNCCCAC site II element, P-box, and  
295 the GRF and FAR1 binding sites (Rushton et al., 2002; Walley et al., 2007; Doherty et al., 2009;  
296 Fernández-Calvo et al., 2011; Moore et al., 2022). Other putative CREs have not previously been  
297 identified as touch responsive. One CRE was exclusively enriched in touch repressed genes at all  
298 time points, the TCP site II element TGGGC. A GATA-like binding site was enriched among 10  
299 min repressed transcripts. The homeobox binding site (motif) was enriched among both induced  
300 and repressed genes. The CGCG-box was enriched among induced genes at all timepoints  
301 similar to RSRE, CM2, and FAR1. The two CREs known to play a prominent role in protein-  
302 DNA interactions that regulate secondary cell wall thickening were also significantly enriched  
303 (Coomey et al., 2020). The VNS element was enriched among induced genes, and the AC  
304 element ACC(A/T)ACC had a unique profile where it was enriched among repressed genes at 10  
305 min, enriched in both induced and repressed genes at 30 min, and among induced genes only at  
306 60 min.

307  
308 **Root morphology is altered by *SWIZ-OE* and touch treatment**

309 Given the SWIZ protein mechanotropic response and regulatory influence, we then investigated  
310 how SWIZ might impact plant growth in response to touch. We challenged wildtype and *SWIZ-*  
311 *OE* roots with the same style of touch treatment used in the translocation and gene expression  
312 experiments, but repeated twice daily for a period of five days. In both touch and control  
313 conditions, *SWIZ-OE* roots were significantly shorter than wildtype, suggesting a dwarfing effect



314 from *SWIZ* overabundance (**Fig 8A-C**). Mechanical challenges to roots have been reported to  
315 impact root straightness, a trait that has also been described as being impacted in other bZIP  
316 studies (Van Leene et al., 2016; Zha et al., 2016). In control conditions, we observed that *SWIZ*-  
317 *OE* roots were significantly less straight than wildtype, while this was not observed in in  
318 response to touch (**Fig 8D**). We further tested the mechano-response of *SWIZ-OE* roots by  
319 growing seedlings on plates with increasing degrees of plate angle at 10°, 20°, 30°, and 40° from  
320 vertical (**Fig 9**). Greater angles result in more direct contact between the root tip and media and  
321 thus increased mechanical stimulation in *A. thaliana* (Oliva and Dunand, 2007; Zha et al., 2016).  
322 Wildtype *B. distachyon* roots displayed decreasing root length with increasing plate angle. *SWIZ*-  
323 *OE* roots were shorter than wildtype at all plate angles tested (**Fig 9**). Root straightness did not  
324 show any significant differences. Thus, *SWIZ-OE* roots were shorter than wildtype regardless of  
325 direct touch stimulus or increasing plate angle, and significantly less straight under direct touch.  
326

### 327 ***B. distachyon* displays classic thigmomorphogenic phenotypes**

328 We next investigated the effect of touch treatment on aboveground tissue. Wildtype plants were  
329 perturbed with a metal bar once every 90 min for either two or three weeks (**Supplemental Fig**  
330 **3, 4**). After the treatment period, all plants were allowed to recover and grow undisturbed until  
331 senescence (**Supplemental Fig 4**). Two week stressed plants were significantly shorter than  
332 control plants, and three week stressed plants were shorter still (**Supplemental Fig 4A-B**).  
333 Despite this difference in height, there was not a significant difference between the groups in  
334 terms of aboveground plant weight (**Supplemental Fig 4C**). Three week stressed plants had  
335 significantly more branches ( $p < 0.05$ ), with a non-significant increase in two week stressed  
336 plants (**Supplemental Fig 4D**). Transverse stem cross sections in the third elongated internode  
337 and peduncle did not show a significant difference in cell wall thickness or phloroglucinol  
338 staining in response to touch (**Supplemental Fig 4E-G**).  
339

### 340 **Stem height and cell wall thickening are affected by *SWIZ-OE* and touch treatment**

341 To test the role of *SWIZ* in regulating thigmomorphogenesis and secondary cell wall  
342 development, we tested wildtype and *SWIZ-OE* under two weeks of mechanical perturbation as  
343 described above. In control conditions, there were no differences among genotypes in height,  
344 weight, or branching. Touch significantly shortened both wildtype and *SWIZ-OE* stems relative  
345 to control conditions, but not relative to each other (**Fig 10A, Supplemental Fig 5**). Thus, *SWIZ*-  
346 *OE* stems are inherently shorter than wildtype. Transverse sections of the stem were made in the  
347 peduncle, the last elongated stem internode where the touch treatment occurred during stem  
348 elongation, and stained with phloroglucinol-HCl. *SWIZ-OE* touched peduncles showed  
349 significantly thicker interfascicular fiber cell walls compared to untouched (**Fig 10B-C**). Thus,  
350 overabundance of *SWIZ* transcript sensitized wall thickening in response to touch treatment.  
351

351

352

## 353 **DISCUSSION**

354

355 Touch stimulus is generally an inhibitor of plant elongation growth, but promotes branching and  
356 radial expansion (Jaffe, 1973; Braam, 2004; Chehab et al., 2009). The majority of this work has  
357 been done in dicots, where increased radial growth has been associated with greater deposition of  
358 secondary wall forming cells, particularly in woody species such as poplar (Biro et al., 1980;  
359 Coutand et al., 2009; Börnke and Rocks, 2018; Roignant et al., 2018; Niez et al., 2019). Our  
360 understanding of thigmomorphogenesis in grasses is limited, and mostly in the agricultural  
361 context of lodging (Shah et al., 2019). While these studies highlight the importance of stem  
362 strength and associated cell wall defects, they do relatively little to elucidate the  
363 mechanosensitive response. Recent work by Gladala-Kostarz et al (2020) describes grass touch  
364 response to both wind and direct mechanical treatment, with an emphasis on cell walls and stem  
365 anatomy. Touch treatment significantly increased lignin content, and also altered the relative  
366 abundance of wall bound hydroxycinnamates. Wall polysaccharide content, particularly glucose  
367 and galactose, also increased. Consistent with increased secondary wall lignification, touched  
368 plants had increased wall stiffness and decreased saccharification.

369  
370 Specific gene expression patterns have become molecular hallmarks of plant touch response,  
371 most notably induction of the *TCH* and similar genes. Orthologs of wall modifying XTHs and  
372 CAM/CML signaling genes are upregulated in response to mechanical stimulation across  
373 species, and as we present here, in *B. distachyon*. Touch elicits major global changes in gene  
374 expression, with 2.5% to 10% of the genes assayed in *A. thaliana* and poplar differentially  
375 expressed (Lee et al., 2005; Pomiès et al., 2017; Van Moerkercke et al., 2019). In sorghum  
376 (*Sorghum bicolor*), leaf sheath imposes mechanical constraints on emerging buds, and removing  
377 this dramatically altered gene expression, with 42% of genes differentially expressed over a 9 h  
378 period (Liu and Finlayson, 2019). Our observations of short term (<2 h) touch responses within  
379 stress related pathways align with observations from poplar and *A. thaliana*, with rapid induction  
380 of *TCH*, biotic, and abiotic stress related genes (Pomiès et al., 2017). Canonical touch responsive  
381 genes such as the orthologs of *TCH1-4* and related *XTH* and *CML* genes were upregulated  
382 immediately following stimulus. However, we also note the previously unreported touch-  
383 induction of GH17 family genes, as well as *CSLF6*, suggesting a role for MLG and  $\beta$ -1,3 glucan  
384 modification in grass touch response.

385  
386 In both poplar and in our analysis of *B. distachyon* touch responses, touch-regulated expression  
387 of secondary cell wall related transcripts differed between early and late timepoints. Upon touch,  
388 we observed immediate repression of many key cell wall biosynthetic enzymes, followed by  
389 significant upregulation one hour after stimulus. In poplar, no significant repression of these  
390 transcripts was reported, but terms related to wood or cell wall synthesis were also not enriched  
391 among touch-regulated transcripts until 24 or 72 hours after touch (Pomiès et al., 2017). While  
392 differences in the method used to quantify gene expression, and in the temporal sampling scheme  
393 complicate direct comparisons of plant touch response experiments, this may suggest that

394 delayed induction of secondary cell wall transcripts is a common feature of plant touch  
395 responses.

396

### 397 **Thigmomorphogenesis and secondary cell walls**

398 Our understanding of touch responsive gene expression is further informed by the dynamics of  
399 SWIZ nuclear translocation. The timing of SWIZ nuclear accumulation following mechanical  
400 stimulus was consistent with observations of *A. thaliana* Group I bZIPs (Tsugama et al., 2014;  
401 Tsugama et al., 2016). However, by adopting a finer temporal sampling scheme, and quantifying  
402 nuclear signal sooner after touch (2 vs. 30 min), our results clarify the rapid and immediate  
403 nature of this translocation. Furthermore, we show that the speed and magnitude of SWIZ  
404 nuclear accumulation is not diminished over three successive touch treatments. Notably, poplar  
405 transcriptional responses to a second touch stimulus were significantly attenuated relative to a  
406 single treatment, and in separate experiments, trees subjected to a daily touch treatment over four  
407 days no longer showed touch-induced increases in their rates of radial growth (Martin et al.,  
408 2010; Pomiès et al., 2017). Thus, if *B. distachyon* is likewise desensitized to repeated touch, the  
409 high repeatability of SWIZ translocation might implicate a mechanism downstream of touch  
410 perception and bZIP translocation in mediating that shift. Like the touch-responsive transcription  
411 factor AtVIP1, SWIZ translocation occurred in the specific area of touch treatment, suggesting a  
412 local response to stimulus rather than a tissue or whole organism response. *SWIZ-OE* roots were  
413 shorter than wildtype under control, direct touch, and multiple plate growth angles. This may  
414 suggest that *SWIZ-OE* roots grown in agar media experience a sufficient degree of mechanical  
415 input to reduce elongation.

416

417 Another component of this reduced elongation may be increased secondary cell wall deposition,  
418 as this could terminate elongation. The CREs enriched among genes induced or repressed by  
419 touch revealed an overlap between CREs previously associated with wounding such as the RSRE  
420 and CM2 and more subtle touch treatments. Two CREs not previously associated with touch  
421 response, the AC and VNS elements, are DNA targets of MYB and NAC transcription factors  
422 that regulate the thickening of secondary cell walls (Ohtani et al., 2011; Zhong et al., 2011; Kim  
423 et al., 2012; Zhong and Ye, 2012; Handakumbura et al., 2018; Olins et al., 2018). These CREs  
424 may be the target of wall biosynthesis genes that were touch responsive and differentially  
425 expressed in *SWIZ-OE*.

426

427 Prior to touch, almost the entire monolignol biosynthetic pathway, including laccase genes that  
428 radicalize monolignols, and BAHD acyltransferases that add hydroxycinnamic acids to wall  
429 polymers, are significantly downregulated in *SWIZ-OE* plants. Following touch, most of these  
430 genes become significantly upregulated. This activity is consistent with our observations of  
431 increase in wall thickness in touched *SWIZ-OE* peduncles, and aligns with the compositional data  
432 presented by Gladala-Kostarz et al. (2020). This activation may be a result of direct binding of  
433 SWIZ to modulate expression, or an indirect effect from another transcriptional regulator such as

434 the NAC transcription factor *SWN5* that is significantly upregulated in *SWIZ-OE* following touch  
435 and capable of activating the full developmental program for secondary cell wall synthesis  
436 (Valdivia et al., 2013). While the E-box (CANNTG) was initially described as a bHLH binding  
437 motif, many bZIP groups in *A. thaliana* have been shown to bind similar sequences. The two  
438 closets *A. thaliana* orthologs of SWIZ, bZIP18 and 52, both bind (A/C)CAG(G/C)(T/C), while  
439 VIP1 binds (A/C)CAGCT(G/A) (O'Malley et al., 2016). Using the same technique, we identified  
440 the SWIZ binding motifs as (A/C)CAGNCTG(T/G) and (A/C)CAGCTG(T/G). Both of these  
441 sequences are similar to those bound by *A. thaliana* orthologs, although the presence of an  
442 ambiguous nucleotide in the core of one variant is not previously reported for other Group I  
443 bZIPs. Among genes bound by SWIZ *in vitro*, we observed both activation and repression  
444 following touch, suggesting a complex regulatory function for SWIZ. Furthermore, SWIZ direct  
445 binding sites were found in both promoter regions and in the body of genes and most often in  
446 genes activated by touch. SWIZ gene body binding targets tended to be repressed in *SWIZ-OE*  
447 plants following touch, without either being clearly associated with up or down regulation.  
448 AtVIP1 and AtbZIP29 have both been described as activators, particularly of genes related to  
449 biotic and abiotic stress response, cell cycle control, and development. (Yin et al., 1997; Ringli  
450 and Keller, 1998; Pitzschke et al., 2009; Van Leene et al., 2016). AtbZIP18 is described as a  
451 repressor of transcription (Tsunami et al., 2012; Gibalová et al., 2017).

452 bZIPs are known to homo- and heterodimerize through their leucine zipper domains (Schütze et  
453 al., 2008), and in *A. thaliana* the combinatorial interactions of different bZIP groups have been  
454 fairly well described (Deppmann et al., 2004; Ehlert et al., 2006; Grigoryan and Keating, 2006;  
455 Weltmeier et al., 2006; Schütze et al., 2008). These interactions can have a synergistic effect on  
456 transcriptional activity, and can result in unique binding interactions (Schütze et al., 2008; Van  
457 Leene et al., 2016). It is conceivable that this heterodimerization may explain some aspects of  
458 our results, such as why so many of the cell wall genes that are upregulated in *SWIZ-OE* after  
459 touch are significantly downregulated prior to touch. One hypothesis is that SWIZ, as with many  
460 other bZIPs, can regulate targets as a heterodimer. The abundance of SWIZ protein in the  
461 cytoplasm in *SWIZ-OE* plants prior to touch may act as a sink, sequestering interacting partners  
462 that would otherwise be regulating targets independent of a touch stimulus. Further  
463 experimentation is needed to elucidate this bZIP regulatory network in response to touch and  
464 other stimuli.

## 465 CONCLUSIONS

466 Proteins orthologous to SWIZ in other species have been implicated in cell wall development  
467 and remodeling, but not cell wall thickening. Touch significantly remodeled the *B. distachyon*  
468 transcriptome, with notable changes in wall polysaccharide biosynthetic gene expression not  
469 previously reported and revealed an enrichment of secondary cell wall associated CREs, the AC  
470 and VNS elements. Enhanced SWIZ function through overexpression amplified this touch-  
471 responsive gene expression. Together, the evidence presented here connects mechanotropic bZIP  
472 dynamics with thigmomorphogenesis and secondary cell wall transcriptional regulation.

473

## 474 MATERIALS AND METHODS

### 475 Phylogenetic analysis

476 Protein sequences described for *A. thaliana*, *B. distachyon*, and *O. sativa* (Liu and Chu, 2015) as  
477 Group II bZIPs were selected and searched against the most recent genome annotations in  
478 Phytozome v12.1 (<https://phytozome.jgi.doe.gov>). The *Nicotiana tabacum* homologs NtRSGa  
479 and NtRSGb were also added to the analysis. Protein sequences were aligned using the MAFFT  
480 service for multiple sequence alignment with the iterative refinement method L-INS-I (Kato et  
481 al., 2019). The alignment was used to construct the phylogenetic tree using a maximum  
482 likelihood analysis with a bootstrap resampling value of 1000 in W-IQ-TREE (Trifinopoulos et  
483 al., 2016). All of the proteins included in the phylogenetic analysis are described in

### 484 Supplemental File 1.

485

### 486 Plant transformation

487 Overexpression and artificial microRNA transgenes and transgenic plants were constructed as  
488 previously described (Handakumbura et al., 2013). The full length coding sequence of  
489 Bradi1g17700 was amplified from cDNA and cloned into the pOL001 ubigate ori1 binary  
490 expression vector (Handakumbura et al., 2018) to make the *SWIZ-OE* transgene. The coding  
491 sequence lacking the stop codon was amplified and fused in frame with the coding sequence of  
492 *Aequorea victoria* enhanced GFP in the pOL001 vector to generate *SWIZ:GFP-OE*.

493

### 494 Translocation assay

495 Seeds were surface sterilized and grown vertically on 1X MS media, pH 5.7, without sucrose for  
496 6d at 28°C in the dark. After 6 d, seedlings were moved to treatment plates containing 1X MS  
497 media, pH 5.7, plus varying concentrations (0, 10, 50, or 100 mM) of GA4, paclobutrazol. Roots  
498 were positioned such that they were completely submerged in media and relatively flat along the  
499 imaging plane. After a 6 h incubation, plants were stimulated and imaged.

500 All observations were made on a Nikon A1R scanning confocal microscope using a Plan Apo  
501 10x 0.5NA objective. Root areas to be observed were located by eye using transmitted light and  
502 then confirmed under confocal conditions using a 488 nm laser and green filtered PMT detector.  
503 The X, Y, and Z coordinate stage locations of each region were programmed into the Nikon NIS  
504 Elements 5.2 Advanced Research V6 software package for automated imaging. After all target  
505 regions were programmed, 30 min of imaging began pre-treatment, with images captured every 2  
506 min.

507 To elicit the touch response, the observed root region was gently probed 5 times in ~5 sec with a  
508 blunt probe while observing through the eyepiece (**Supplemental Fig 7**). Images were captured  
509 for 60-90 min post treatment. For experiments with multiple stimulus events, the timelapse  
510 sequence was paused and roots were probed as described for the relevant stimulus events.

511 Analysis of GFP signal was done using the Nikon NIS Elements Advanced Research V5  
512 software package. For each time series, the frame showing maximal nuclear signal was selected  
513 and used as a reference point. Using the General Analysis tool, a channel for GFP signal was  
514 established and thresholded for intensity and particle size to identify the nuclear regions. These  
515 regions were added to the timelapse image series as a binary layer and then converted to static  
516 regions of interest for quantification. The GFP intensity under each nuclear region of interest was  
517 calculated for the course of the timelapse and the average signal from each nucleus was plotted  
518 for intensity over time.

519

### 520 **Thigmomatic construction and operation**

521 The Thigmomatic is a basic robotic device that sweeps plants with a metal bar at regular  
522 intervals to elicit a touch response. The device was constructed from aluminum V-Slot linear rail  
523 (Openbuilders Partstore, Monroeville, NJ) and bracket joints for the upright supports (20x20  
524 mm), cross bars (20x20 mm), and tracks (20x40 mm). Two gantry carts ride along the 20x40 mm  
525 V-Slot linear rails, connected by a 6.35 mm diameter metal rod bolted to the carts. Their  
526 movement is powered by a belt driven linear actuator system using a NEMA 17 stepper motor  
527 with a 12V 18W AC/DC power supply. The stepper motor provides fine spatial control over the  
528 gantry cart position with bi-directional motion. Motor function is controlled by a Raspberry Pi  
529 3B microcomputer equipped with a stepper motor HAT (Adafruit Industries, New York). The  
530 Thigmomatic was programmed to cover a specified distance in one direction once every 90 min.  
531 Accession Bd21-3 was used for these experiments. Seeds were stratified on wet paper towel  
532 wrapped in foil to exclude light for 10 days at 4°C before being planted in Promix BX potting  
533 mix in SC10 Ray Leach Cone-tainers (Stuewe & Sons Inc). Plants were grown in a Percival  
534 PGC-15 growth chamber with day/night conditions of 20 h light at 24°C and 4 h dark at 18°C,  
535 respectively.

536

### 537 **Transverse stem sections and histology**

538 The main stem of senesced plants was taken and the internode of interest removed and embedded  
539 in 8% agarose. A Leica VT1000 Vibratome was used to make 55 µm thick transverse sections.  
540 Histochemical staining was carried out using phloroglucinol-HCl as previously described (Matos  
541 et al., 2013). Images were obtained at 4, 10, and 20X using a Nikon Eclipse E200MV R light  
542 microscope and PixeLINK 3 MP camera. Transverse sections imaged at 20x were used for cell  
543 wall thickness measurements. Interfascicular fiber cells separated by one cell layer from the  
544 mestome cells on the phloem side of major vascular bundles were targeted for measurement.  
545 Using ImageJ, lines were drawn across two walls of adjoining cells. The resulting line length  
546 was divided by two to give one cell wall width. Approximately 15 measurements were made for  
547 each plant.

### 548 **RNA extraction and quantification and analysis**

549 Seedlings were grown for 6 d on vertical 1X MS agar plates. Touch treatment was performed as  
550 described above using a metal probe along the entire length of the root. Untouched samples were

551 collected immediately before touch treatment began, and touched samples were collected after  
552 the designated time. Three roots were pooled per biological replicate, and RNA was extracted  
553 using the Qiagen RNeasy Plant Mini Kit with on-column DNA digestion with RNase-free DNase  
554 I (Qiagen). Strand-specific libraries were prepared using the Illumina TruSeq kit. Libraries were  
555 sequenced using Illumina technology. Sequences were processed as previously described  
556 (MacKinnon et al., 2020). Briefly, the transcripts were checked for quality using FastQC  
557 (Andrews, 2010), then aligned to the Bd21 reference genome (v3.1) using HiSat2 (Kim et al.,  
558 2015), then assembled and quantified using StringTie (Pertea et al., 2015). Transcripts were  
559 normalized and assessed for differential expression using the likelihood ratio test from the R  
560 (v3.6.0) package DESeq2 (Love et al., 2014). Benjamini-Hochberg  $p$ -value adjustments were  
561 applied to account for multiple testing with a significance cutoff of 0.1. Of the 34,310 genes in  
562 the reference genome, 30,380 had non-zero read counts after normalization. In total there was an  
563 average mapping percentage of 97.8% for all libraries, as determined by SAMtools (Li et al.,  
564 2009). Specific treatment contrasts (i.e., wildtype vs *SWIZ-OE*) were identified and compared  
565 using the Wald test from DESeq2 (Love et al., 2014). Statistical enrichment of gene families was  
566 assessed using Fisher's exact test. Raw read data was deposited in the European Nucleotide  
567 Archive for public access (Accession no.: E-MTAB-10084).

#### 568 **DNA affinity purification sequencing**

569 DNA affinity purification was carried out as previously described (Handakumbura et al., 2018).  
570 In brief, transcription factor coding sequences were HALO tagged and mixed with Bd21  
571 genomic DNA for *in vitro* binding. Protein-DNA was crosslinked, fragmented,  
572 immunoprecipitated using the HALO antibody, barcoded, and sequenced. Reads were mapped  
573 back to the Bd21 genome using HiSat2 (Kim et al., 2015) to identify binding target loci. Peak  
574 calling and motif analysis was done using HOMER v4.10 (Hypergeometric Optimization of  
575 Motif EnRichment) suite (Heinz et al., 2010). Motif enrichment was calculated against the  
576 hypergeometric distribution; the significance threshold was set to  $p < 0.05$ . The nearest annotated  
577 gene to a bound peak was used for GO analysis. Raw read data were deposited in the European  
578 Nucleotide Archive for public access (Accession no.: E-MTAB-10066).

579

#### 580 **Gene Ontology analysis**

581 Phytozome was used to find orthologs for all *B. distachyon* v3.1 genes as the reciprocal best  
582 match to *A. thaliana* TAIRv10 protein sequences. Arabidopsis gene identifiers were submitted to  
583 g:Profiler (Raudvere et al., 2019) for KEGG and Wiki pathway enrichment analysis.

#### 584 **iDREM network analysis**

585 Probabilistic graphical models that predict diverging gene expression paths and the points at  
586 which regulators may influence those paths were generated using iDREM (Ding et al., 2018).  
587 Briefly, this software applies an input-output hidden Markov model to time course gene  
588 expression data overlaid with static regulatory information, in this case *SWIZ* protein-DNA

589 interactions identified from DAP-seq. GO analysis, described above, was also applied to the gene  
590 sets in each path identified by iDREM.

591

### 592 **Cis-regulatory sequence analysis**

593 *Cis*-regulatory sequence analysis of differentially expressed genes after touch was implemented  
594 by categorizing them based on an increase or decrease in transcript abundance at each time point.  
595 Homer v.4.10 was used to identify regulatory sequences in the 1000 bp upstream of the  
596 transcriptional start site of differentially expressed genes previously identified in *A. thaliana*  
597 DAP-seq analysis (Heinz et al., 2010; O'Malley et al., 2016). These motifs were visualized using  
598 the SeqLogo package. Another approach with different assumptions was implemented as  
599 previously described (Moore et al., 2022). In brief, touch-responsive genes were divided into six  
600 groups: up or down regulated each at 10, 30, and 60 min after touch. To find putative CREs,  
601 1000 bp upstream of differential expressed genes were retrieved and searched for all possible 6-  
602 mers. The growing k-mers approach was conducted to include longer k-mers. For instance, for 7-  
603 mers, eight possible situations could be considered for each significant 6-mer, by adding A, T, C  
604 and G to each end of a 6-mer. If the *p*-value was lower, the 7-mer(s) was kept; if not, 7-mers  
605 were discarded. This growing *k*-mer approach continued until a 12-mer length was reached. The  
606 Tomtom tool in MEME Suite 5.4.1 was used to find similarities between significant CREs for  
607 each cluster with the *A. thaliana* DAP-seq database. Putative CREs with a false discovery rate  
608 less than 0.01 were considered as the best match for known CREs.

609

### 610 **Root Touch Experiment**

611 Seeds were surface sterilized and plated on 1x MS, pH 5.7, containing 0.05 % MES as a  
612 buffering agent and 1% plant agar (Gold Bio). Seeds were stratified on plates in the dark at 4 °C  
613 for 2 days and then transferred to a Percival PGC-15 growth chamber with day/night conditions  
614 of 16h light at 24 °C and 8h dark at 18 °C, respectively and grown at a ~10° angle from vertical.  
615 After 2 days of preliminary growth, a touch location was designated by selecting the lower of 1  
616 cm up from the root tip or 1 cm down from the seed and marked on the plate. Each day for 5  
617 days, this marked spot was treated twice a day, two hours before and two hours after chamber  
618 midday (ZT6 and ZT10). Touch treatment consisted of 5 firm presses with the side of a sterile  
619 pipette tip, just hard enough to cause elastic deformation of the media underlying the root when  
620 viewed through a dissecting microscope. To ensure unbiased application of touch treatment and  
621 control for any blocking effects, each plate contained one group of four *SWIZ-OE* seeds and one  
622 group of four Bd21-3 wildtype seeds, with the experimenter blinded to their respective positions  
623 for the duration of the experiment.

624

### 625 **Root length and straightness measurement**

626 Plates were photographed at the conclusion of the experiment. To generate high contrast images  
627 suitable for root tracing, plate images were separated into hue, saturation and brightness  
628 channels, and the saturation channel was selected and inverted. Semi-automated measurements



629 of root length were performed using the Smart Roots plugin for ImageJ (Lobet et al., 2011).  
630 Straightness was quantified as described in (Swanson et al., 2015); the straight line distance  
631 between root tip and the base of the seed was measured, and this value was divided by the traced  
632 length of the root.

## 633 SUPPLEMENTAL MATERIALS

634 **Supplemental Table S1. Cluster 56 from network analysis of gene expression atlas (Sibout**  
635 **et al. 2017) includes Bradi1g17700.**

636 **Supplemental Table S2. Differentially expressed genes in wildtype Bd21-3 root tissue 10**  
637 **min after touch treatment.**

638

639 **Supplemental Table S3. Differentially expressed genes in wildtype Bd21-3 root tissue 30**  
640 **min after touch treatment.**

641

642 **Supplemental Table S4. Differentially expressed genes in wildtype Bd21-3 root tissue 60**  
643 **min after touch treatment.**

644 **Supplemental Table S5. Calmodulin and calmodulin-like touch responsive gene expression**  
645 **in wildtype Bd21-3 root tissue.**

646 **Supplemental Table S6. XTH and XTH-like touch responsive gene expression in wildtype**  
647 **Bd21-3 root tissue.**

648 **Supplemental Table S7. Glycoside hydrolase touch responsive gene expression in wildtype**  
649 **Bd21-3 root tissue.**

650 **Supplemental Table S8. GO analysis of genes in iDREM identified pathways derived from**  
651 **differential gene expression following touch in wildtype, swiz-amRNA, and SWIZ-OE root**  
652 **tissue.**

653

654 **Supplemental Table S9. DAP-seq results of SWIZ genome binding locations.**

655

656 **Supplemental Table S10. All putative CREs enriched in differentially expressed genes at**  
657 **each timepoint identified using the k-mer approach.**

658

659 **Supplemental Table S11. CREs described for *Arabidopsis thaliana* in O'Malley et al. 2016**  
660 **that match CREs identified using the k-mer approach.**

661

662 **Supplemental Figure 1. Description of SWIZ transgenic reagents. (A) Diagram of SWIZ**  
663 **overexpression transgenes. The *ZmUbi* promoter was used to drive expression of the SWIZ**  
664 **coding sequence, either alone or fused in frame with *eGFP*. (B) Relative level of SWIZ transcript**  
665 **measured by RT-qPCR in whole stem tissue was collected 1 d after inflorescence emergence in**

666 *SWIZ:GFP-OE*. LB, left border; *ZmUbi* prom, maize ubiquitin promoter; Hyg, hygromycin  
667 phosphotransferase gene; NOS, nopaline synthase terminator; RB, right border. ns:  $p > 0.05$ , \*:  $p < 0.05$ .

669

670 **Supplemental Figure 2. Network analysis of differential gene expression paths and**  
671 **enriched GO terms.** (A) Path determinations from iDREM time course analysis. Each line  
672 represents a set of genes with similar expression level patterns over the time course relative to  
673 time 0, pre-touch. (B) Heatmap of selected GO term enrichment of genes from iDREM path  
674 analysis. Color indicates  $q$ -value score, with a cutoff of 0.1. Terms without a colored block are  
675 not significantly enriched in that path.

676

677 **Supplemental Figure 3. Thigmomatic, an automated system to administer touch stimulus.**  
678 (A) Overview of Thigmomatic inside a Percival PGC-15 growth chamber showing linear rail  
679 based frame (1), gantry carts (2), NEMA17 stepper motor (3), 12V 18W AC/DC power supply  
680 (4), and Raspberry Pi 3b microcomputer (5). (B) Thigmomatic making contact with a  
681 *Brachypodium distachyon* plant.

682

683 **Supplemental Figure 4. *Brachypodium distachyon* displays classic thigmomorphogenic**  
684 **phenotypes.** One-week-old wildtype plants were treated with touch stimulus every 90 min. (A)  
685 Left to right, plants that experienced no stress, two weeks stress, three weeks stress and were  
686 then allowed to recover, imaged one week after the end of treatment (B) height, (C) aboveground  
687 non-grain biomass weight, and (D) branch number were measured at senescence. Significance  
688 denoted by compact letter display reflecting Tukey HSD adjusted  $p$ -values  $< 0.05$ . (E)  
689 Transverse sections of the peduncle or third internode were taken from control, 2 week stressed,  
690 and 3 week stressed plants and stained with phloroglucinol-HCl. (F) Quantification of  
691 interfascicular fiber wall thickness. Scale bar = 100  $\mu$ m.  $n = 3$  plants per treatment.

692

693 **Supplemental Figure 5. Biomass and branching in *SWIZ-OE* under touch treatment shows**  
694 **no difference from wildtype.** Wildtype and *SWIZ-OE* plants were placed under control  
695 conditions or received two weeks of mechanical stress every 90 min. After senescence, branch  
696 number (A) and aboveground biomass weight (B) were quantified. Significant differences were  
697 not observed following ANOVA and Tukey HSD testing.

698

699 **Supplemental Figure 6. *Brachypodium distachyon* cis-regulatory sequences most**  
700 **overrepresented at each time course after touching.** Each nucleotide sequence is a position  
701 probability matrix motif derived from DNA-affinity purification sequencing and identified as  
702 enriched under different time courses. The height of the letter at each position is proportional to  
703 the probability of a given nucleotide.

704

705 **Supplemental Figure 7. Method of root touch treatment.** A blunt probe formed from a glass  
706 Pasteur pipette was used to gently tap on the root five times in areas similar to those indicated by

707 the orange arrows.

708

709

710 **Supplemental File 1. Gene names and amino acid sequences used in the SWIZ bZIP Group**  
 711 **I phylogenetic analysis.**

712

713 **ACCESSION NUMBERS**

714 AtbZIP18 (At2g40620), AtbZIP29 (At4g38900), AtbZIP52 (At1g06850), AtTCH1/AtCaM2  
 715 (At2g41110), AtTCH2/AtCML24 (At5g37770), AtTCH3/CML12 (At2g41100),  
 716 AtTCH4/AtXTH22 (At5g57560), CAD1 (Bradi3g17920), CESA4 (Bradi4g28350), COMT6  
 717 (Bradi3g16530), CSLF6 (Bradi3g16307), GA2ox3 (Bradi2g50280), SWAM3/MYB44  
 718 (Bradi1g30252), NAC35 (Bradi2g28020), NtRSGa (Niben101Scf01150g00005), NtRSGb  
 719 (Niben101Scf02191g00014), SWIZ (Bradi1g17700), VIP1 (At1g43700).

720 **ACKNOWLEDGEMENTS**

721 This work was supported by the Office of Science, Biological and Environmental Research,  
 722 Department of Energy (DE-FG02-08ER64700DE and DE-SC0006641) and The National  
 723 Science Foundation Division of Integrative Organismal Systems (NSF IOS-1558072) to S.P.H..  
 724 The work conducted by the US DOE Joint Genome Institute is supported by the Office of  
 725 Science of the US Department of Energy under Contract no. DE-AC02-05CH11231. The  
 726 microscopy data was gathered in the Light Microscopy Facility and Nikon Center of Excellence  
 727 at the Institute for Applied Life Sciences, UMass Amherst with support from the Massachusetts  
 728 Life Sciences Center.

729 **Table 1.** The count of differentially expressed genes relative to untouched wildtype plants that  
 730 were SWIZ DAP-seq targets in either the promoter or gene body regions.

| Time after touch | Promoter        |            | Gene body  |            |
|------------------|-----------------|------------|------------|------------|
|                  | Up              | Down       | Up         | Down       |
| (min)            | percent (count) |            |            |            |
| 0                | 42.0 (103)      | 58.0 (142) | 48.0 (286) | 52.0 (310) |
| 10               | 57.0 (73)       | 43.0 (55)  | 53.0 (167) | 47.0 (148) |
| 30               | 59.4 (79)       | 40.6 (54)  | 41.2 (136) | 58.8 (194) |

|    |           |           |            |            |
|----|-----------|-----------|------------|------------|
| 60 | 64.2 (77) | 35.8 (43) | 45.7 (128) | 54.3 (152) |
|----|-----------|-----------|------------|------------|

731

## 732 **FIGURE LEGENDS**

733

734 **Figure 1. SWIZ is a Group I bZIP highly expressed in maturing stem and root.** (A) SWIZ transcript  
735 abundance in *Brachypodium distachyon* leaf, root, and stem tissue measured by microarray. Mean +/-  
736 standard deviation of three biological replicates. (B) Phylogeny analysis of amino acid sequences from *B.*  
737 *distachyon* (green), *Oryza sativa* (blue), *Arabidopsis thaliana* (red), *Nicotiana tabacum* (orange) shows  
738 SWIZ (black dot). The phylogeny was reconstructed using maximum likelihood analysis with a bootstrap  
739 resampling value of 1000. The numbers labeled on the branches are the posterior probability to support  
740 each clade. The protein sequences, full locus IDs, and plant species with genome source are provided in  
741 Supplemental File 1.

742

743 **Figure 2. SWIZ translocates to the nucleus in response to mechanical stimulus, specifically**  
744 **in regions directly stimulated.** (A) Image of *SWIZ:GFP-OE* and *GFP-OE* roots prior to  
745 stimulus and 30 min post stimulus. Roots were observed immediately following mechanical  
746 perturbation. (B) Quantification of nuclear signal in control (purple) and touched (teal)  
747 conditions for *GFP-OE* (left) and *SWIZ:GFP-OE* (right). n = 14-20 nuclei. (C) SWIZ  
748 translocation occurred in the local area of the stimulus. At 30 min, stimulus was applied to an  
749 upper region of the root, while at 120 min it was applied to a lower region approximately 3 cm  
750 below. n = 109, 184 nuclei respectively for upper and lower regions. (D) *SWIZ:GFP-OE* roots  
751 were imaged by confocal microscopy with stimulus applied in the field of view at 0, 90, and 180  
752 min. n = 126 nuclei. (B-D) Images were taken every 2 min. Nuclear GFP signal was quantified in  
753 selected nuclei at each time point. The average nuclear GFP signal is represented by the line with  
754 error bars indicating standard error of the mean.

755

756

757 **Figure 3. Transcriptome analysis of touch response in *Brachypodium distachyon* roots.** (A)  
758 Root tissue was sampled just prior to touch (t = 0), and at 10, 30, and 60 min following touch  
759 treatment in wildtype and *SWIZ-OE*. (B) Principal component analysis of gene expression across  
760 samples shows the greatest difference corresponding to genotype and the second greatest  
761 corresponding to time after touch. (C) Canonical, as well as novel touch responsive genes are  
762 upregulated in *B. distachyon* following touch. Closest orthologs of the *Arabidopsis thaliana*  
763 *TOUCH* genes encoding calmodulin-like (CML) and xyloglucan endo-  
764 transglycosylase/hydrolases (XTH) are upregulated following touch, as are previously  
765 unreported members of the glycosyl hydrolase 17 (GH17) family. Full list of gene expression for  
766 *TOUCH* and glycoside hydrolases defined by Tyler et al. (2010) in Supplemental Tables 5, 6, and  
767 7. Significance denoted by \* reflecting  $q < 0.1$  compared to expression at t = 0, with q-values  
768 representing Wald test p-values adjusted for false discovery rate.

769

770

771 **Figure 4. Gene expression analysis of cell wall related genes.** Log fold-change of gene  
772 expression measured by RNA-seq in wildtype and *SWIZ-OE*, presented as relative to wildtype

773 expression at time 0, pre-touch. Bar color indicates class of cell wall gene. Error bars indicate  
774 standard deviation of three biological replicates. Significance denoted by \* reflecting  $q < 0.1$   
775 compared to wildtype expression at  $t = 0$ , with  $q$ -values representing Wald test  $p$ -values adjusted  
776 for false discovery rate. Legend abbreviations: BAHD, BAHD (BEAT, AHCT, HCBT, and  
777 DAT) acyltransferases; CESA, cellulose synthase; MLG, mixed-linkage glucans.  
778

779 **Figure 5. DNA affinity purification sequencing to determine SWIZ binding sites.** (A) Top  
780 two most statistically enriched sequence motifs in SWIZ binding sites. (B) Distribution of  
781 binding sites across genomic features, relative to primary transcripts of the *Brachypodium*  
782 *distachyon* annotation v 3.1. (C) Relative distribution of binding sites centered on the  
783 transcriptional start site (TSS, blue dashed line), transcriptional termination site (TTS, red dashed  
784 line) represents the average length of all annotated transcripts, approximately 4.5 kb away from  
785 the TSS. (D) Path determinations from iDREM time course analysis of differentially expressed  
786 genes that also have DAP-seq binding sites. Each line represents a set of genes with similar  
787 expression level patterns over the time course relative to time 0, pre-touch.  
788

789 **Figure 6. SWIZ binding targets differentially expressed in response to touch and SWIZ-OE.**  
790 Gene expression over time of selected genes with SWIZ binding sites. Line graphs are the  
791 average transcript abundance of three biological replicates for each time point. Binding site  
792 determined as peaks of sequence alignment. Scale bar unit is bases. Direction of transcription is  
793 shown with arrows on the gene model, 5' and 3' UTRs are depicted by narrowed rectangles on  
794 the gene model.  
795

796 **Figure 7. Sequence motifs enriched in the cis-regulatory regions of touch responsive**  
797 *Brachypodium distachyon* genes. Negative log  $p$ -values for *cis*-elements, known and not known  
798 to be touch responsive. RSRE - Rapid Stress Response Element, FAR1 - FAR-RED impaired  
799 response1, GRF - Growth Regulating Factor, VNS - VND, NST/SND, SMB.  
800

801 **Figure 8. SWIZ-OE roots are shorter than wildtype with no significant difference in**  
802 **straightness in response to direct touch.** Wildtype and *SWIZ-OE* seedlings grown on plates  
803 under control (A) or touched (B) conditions for five days. Touched plants were probed with a  
804 pipette tip twice a day. (C) Quantification of root length in control and touched conditions.  
805 Significance denoted by compact letter display reflecting Tukey HSD adjusted  $p$  values  $< 0.05$ .  
806 (D) Quantification of root straightness in control and touch conditions. Significance denoted by \*  
807 reflecting Wilcoxon sign-ranked test for non-parametric data with  $p$ -value  $< 0.05$ , ns = not  
808 significant. Scale bar = 1 cm.  
809

810 **Figure 9. Wildtype roots shorten with increasing plate angle, while SWIZ-OE roots are**  
811 **consistently short, with no significant difference in straightness.** Wildtype and *SWIZ-OE*  
812 seedlings grown on plates at (A) 10°, 20°, 30°, and (B) 40° incline from vertical. (C)  
813 Quantification of root length. (D) Quantification of primary root straightness. Significance  
814 denoted by compact letter display reflecting Tukey HSD adjusted  $p$ -values  $< 0.05$ . Scale bar = 1  
815 cm.  
816

817 **Figure 10. SWIZ-OE marginally enhanced thigmomorphogenic response in stems.** Wildtype

818 and *SWIZ-OE* plants were placed under control conditions or received two weeks of mechanical  
819 stress every 90 min. (A) Quantification of main stem height at senescence. (B) Quantification of  
820 interfascicular fiber wall thickness in transverse cross sections of the peduncle. n = 4 to 6 plants  
821 per genotype, per treatment. (C) Representative cross sections stained with phloroglucinol-HCl.  
822 Scale bar = 100  $\mu$ m. Significance denoted by compact letter display reflecting Tukey HSD  
823 adjusted *p*-values < 0.05.

824

825

## 826 REFERENCES

827 **Altartouri B, Bidhendi AJ, Tani T, Suzuki J, Conrad C, Chebli Y, Liu N, Karunakaran C,**  
828 **Scarcelli G, Geitmann A** (2019) Pectin chemistry and cellulose crystallinity govern  
829 pavement cell morphogenesis in a multi-step mechanism. *Plant Physiol* **181**: 127–141

830 **Andrews S** (2010) FastQC: a quality control tool for high throughput sequence data.  
831 <http://www.bioinformatics.babraham.ac.uk/projects/fastqc>:

832 **Bidhendi AJ, Altartouri B, Gosselin FP, Geitmann A** (2019) Mechanical stress initiates and  
833 sustains the morphogenesis of wavy leaf epidermal cells. *Cell Rep* **28**: 1237–1250.e6

834 **Bidhendi AJ, Geitmann A** (2018) Finite element modeling of shape changes in plant cells.  
835 *Plant Physiol* **176**: 41–56

836 **Biro RL, Hunt ER, Erner Y, Jaffe MJ** (1980) Thigmomorphogenesis: changes in cell division  
837 and elongation in the internodes of mechanically-perturbed or ethrel-treated bean plants.  
838 *Ann Bot* **45**: 655–664

839 **Börnke F, Rocksch T** (2018) Thigmomorphogenesis – Control of plant growth by mechanical  
840 stimulation. *Sci Hort* **234**: 344–353

841 **Braam J** (2004) In touch: plant responses to mechanical stimuli. *New Phytol* **165**: 373–389

842 **Braam J, Davis RW** (1990) Rain-, wind-, and touch-induced expression of calmodulin and  
843 calmodulin-related genes in *Arabidopsis*. *Cell* **60**: 357–364

844 **Chehab EW, Eich E, Braam J** (2009) Thigmomorphogenesis: a complex plant response to  
845 mechano-stimulation. *J Exp Bot* **60**: 43–56

846 **Coomey JH, Sibout R, Hazen SP** (2020) Grass secondary cell walls, *Brachypodium distachyon*  
847 as a model for discovery. *New Phytol* **227**: 1709–1724

848 **Coutand C, Martin L, Leblanc-Fournier N, Decourteix M, Julien J-L, Moulia B** (2009)  
849 Strain mechanosensing quantitatively controls diameter growth and PtaZFP2 gene  
850 expression in poplar. *Plant Physiol* **151**: 223–232

851 **Deppmann CD, Acharya A, Rishi V, Wobbes B, Smeekens S, Taparowsky EJ, Vinson C**  
852 (2004) Dimerization specificity of all 67 B-ZIP motifs in *Arabidopsis thaliana*: a

- 853 comparison to *Homo sapiens* B-ZIP motifs. *Nucleic Acids Res* **32**: 3435–3445
- 854 **Ding J, Hagood JS, Ambalavanan N, Kaminski N, Bar-Joseph Z** (2018) iDREM: Interactive  
855 visualization of dynamic regulatory networks. *PLoS Comput Biol* **14**: e1006019
- 856 **Doherty CJ, Van Buskirk HA, Myers SJ, Thomashow MF** (2009) Roles for Arabidopsis  
857 CAMTA transcription factors in cold-regulated gene expression and freezing tolerance.  
858 *Plant Cell* **21**: 972–984
- 859 **Dröge-Laser W, Snoek BL, Snel B, Weiste C** (2018) The Arabidopsis bZIP transcription factor  
860 family—an update. *Curr Opin Plant Biol* **45**: 36–49
- 861 **Ehlert A, Weltmeier F, Wang X, Mayer CS, Smeekens S, Vicente-Carbajosa J, Dröge-  
862 Laser W** (2006) Two-hybrid protein-protein interaction analysis in Arabidopsis protoplasts:  
863 establishment of a heterodimerization map of group C and group S bZIP transcription  
864 factors. *Plant J* **46**: 890–900
- 865 **Fernández-Calvo P, Chini A, Fernández-Barbero G, Chico J-M, Gimenez-Ibanez S,  
866 Geerinck J, Eeckhout D, Schweizer F, Godoy M, Franco-Zorrilla JM, et al** (2011) The  
867 Arabidopsis bHLH transcription factors MYC3 and MYC4 are targets of JAZ repressors  
868 and act additively with MYC2 in the activation of jasmonate responses. *Plant Cell* **23**: 701–  
869 715
- 870 **Fukazawa J, Nakata M, Ito T, Matsushita A, Yamaguchi S, Takahashi Y** (2011) bZIP  
871 transcription factor RSG controls the feedback regulation of NtGA20ox1 via intracellular  
872 localization and epigenetic mechanism. *Plant Signal Behav* **6**: 26–28
- 873 **Fukazawa J, Nakata M, Ito T, Yamaguchi S, Takahashi Y** (2010) The transcription factor  
874 RSG regulates negative feedback of NtGA20ox1 encoding GA 20-oxidase. *Plant J* **62**:  
875 1035–1045
- 876 **Fukazawa J, Sakai T, Ishida S, Yamaguchi I, Kamiya Y, Takahashi Y** (2000) Repression of  
877 shoot growth, a bZIP transcriptional activator, regulates cell elongation by controlling the  
878 level of gibberellins. *Plant Cell* **12**: 901–915
- 879 **Gibalová A, Steinbachová L, Hafidh S, Bláhová V, Gadiou Z, Michailidis C, Müller K,  
880 Pleskot R, Dupřáková N, Honys D** (2017) Characterization of pollen-expressed bZIP  
881 protein interactions and the role of ATbZIP18 in the male gametophyte. *Plant Reprod* **30**:  
882 1–17
- 883 **Gladala-Kostarz A, Doonan JH, Bosch M** (2020) Mechanical stimulation in *Brachypodium*  
884 *distachyon*: implications for fitness, productivity and cell wall properties. *Plant Cell*  
885 *Environ* **43**: 1314–1330
- 886 **Grigoryan G, Keating AE** (2006) Structure-based prediction of bZIP partnering specificity. *J*  
887 *Mol Biol* **355**: 1125–1142
- 888 **Hamant O, Heisler MG, Jönsson H, Krupinski P, Uyttewaal M, Bokov P, Corson F, Sahlin**

- 889 **P, Boudaoud A, Meyerowitz EM, et al** (2008) Developmental patterning by mechanical  
890 signals in Arabidopsis. *Science* **322**: 1650–1655
- 891 **Handakumbura P, Matos D, Osmont K, Harrington M, Heo K, Kafle K, Kim S, Baskin T,**  
892 **Hazen S** (2013) Perturbation of *Brachypodium distachyon* *CELLULOSE SYNTHASE A4* or  
893 *7* results in abnormal cell walls. *BMC Plant Biol* **13**: 131
- 894 **Handakumbura PP, Brow K, Whitney IP, Zhao K, Sanguinet KA, Lee SJ, Olins J,**  
895 **Romero-Gamboa SP, Harrington MJ, Bascom CJ, et al** (2018) *SECONDARY WALL*  
896 *ASSOCIATED MYB1* is a positive regulator of secondary cell wall thickening in  
897 *Brachypodium distachyon* and is not found in the Brassicaceae. *Plant J* **96**: 485–699
- 898 **Heinz S, Benner C, Spann N, Bertolino E, Lin YC, Laslo P, Cheng JX, Murre C, Singh H,**  
899 **Glass CK** (2010) Simple combinations of lineage-determining transcription factors prime  
900 *cis*-regulatory elements required for macrophage and B cell identities. *Mol Cell* **38**: 576–  
901 589
- 902 **Igarashi D, Ishida S, Fukazawa J, Takahashi Y** (2001) 14-3-3 proteins regulate intracellular  
903 localization of the bZIP transcriptional activator RSG. *Plant Cell* **13**: 2483–2497
- 904 **Iida H** (2014) Mugifumi, a beneficial farm work of adding mechanical stress by treading to  
905 wheat and barley seedlings. *Front Plant Sci* **5**: 453
- 906 **Ishida S, Fukazawa J, Yuasa T, Takahashi Y** (2004) Involvement of 14-3-3 signaling protein  
907 binding in the functional regulation of the transcriptional activator REPRESSION OF  
908 SHOOT GROWTH by gibberellins. *Plant Cell* **16**: 2641–2651
- 909 **Ishida S, Yuasa T, Nakata M, Takahashi Y** (2008) A tobacco calcium-dependent protein  
910 kinase, CDPK1, regulates the transcription factor REPRESSION OF SHOOT GROWTH in  
911 response to gibberellins. *Plant Cell* **20**: 3273–3288
- 912 **Ito T, Ishida S, Oe S, Fukazawa J, Takahashi Y** (2017) Autophosphorylation affects substrate-  
913 binding affinity of tobacco Ca<sup>2+</sup>-dependent protein kinase1. *Plant Physiol* **174**: 2457–2468
- 914 **Ito T, Nakata M, Fukazawa J, Ishida S, Takahashi Y** (2014) Scaffold function of Ca<sup>2+</sup>-  
915 dependent protein kinase: tobacco Ca<sup>2+</sup>-DEPENDENT PROTEIN KINASE1 transfers 14-  
916 3-3 to the substrate REPRESSION OF SHOOT GROWTH after phosphorylation. *Plant*  
917 *Physiol* **165**: 1737–1750
- 918 **Jaffe MJ** (1973) Thigmomorphogenesis: The response of plant growth and development to  
919 mechanical stimulation : With special reference to *Bryonia dioica*. *Planta* **114**: 143–157
- 920 **Jaffe MJ, Biro R, Bridle K** (1980) Thigmomorphogenesis: Calibration of the parameters of the  
921 sensory function in beans. *Physiol Plant* **49**: 410–416
- 922 **Jakoby M, Weisshaar B, Dröge-Laser W, Vicente-Carbajosa J, Tiedemann J, Kroj T,**  
923 **Parcy F, bZIP Research Group** (2002) bZIP transcription factors in Arabidopsis. *Trends*  
924 *Plant Sci* **7**: 106–111



- 925 **Katoh K, Rozewicki J, Yamada KD** (2019) MAFFT online service: multiple sequence  
926 alignment, interactive sequence choice and visualization. *Brief Bioinform* **20**: 1160–1166
- 927 **Kim D, Langmead B, Salzberg SL** (2015) HISAT: a fast spliced aligner with low memory  
928 requirements. *Nat Methods* **12**: 357
- 929 **Kim W-C, Ko J-H, Han K-H** (2012) Identification of a *cis*-acting regulatory motif recognized  
930 by MYB46, a master transcriptional regulator of secondary wall biosynthesis. *Plant Mol*  
931 *Biol* **78**: 489–501
- 932 **Leblanc-Fournier N, Martin L, Lenne C, Decourteix M** (2014) To respond or not to respond,  
933 the recurring question in plant mechanosensitivity. *Front Plant Sci* **5**: 401
- 934 **Lee D, Polisensky DH, Braam J** (2005) Genome-wide identification of touch- and darkness-  
935 regulated Arabidopsis genes: a focus on calmodulin-like and XTH genes. *New Phytol* **165**:  
936 429–444
- 937 **Lee H-J, Kim H-S, Park JM, Cho HS, Jeon JH** (2019) PIN-mediated polar auxin transport  
938 facilitates root obstacle avoidance. *New Phytol*. doi: 10.1111/nph.16076
- 939 **Lee TG, Jang CS, Kim JY, Kim DS, Park JH, Kim DY, Seo YW** (2006) A Myb transcription  
940 factor (TaMyb1) from wheat roots is expressed during hypoxia: roles in response to the  
941 oxygen concentration in root environment and abiotic stresses. *Physiol Plant* **129**: 375–385
- 942 **Li H, Handsaker B, Wysoker A, Fennell T, Ruan J, Homer N, Marth G, Abecasis G,  
943 Durbin R, 1000 Genome Project Data Processing Subgroup** (2009) The Sequence  
944 Alignment/Map format and SAMtools. *Bioinformatics* **25**: 2078–2079
- 945 **Liu R, Finlayson SA** (2019) Sorghum tiller bud growth is repressed by contact with the  
946 overlying leaf. *Plant Cell Environ* **42**: 2120–2132
- 947 **Liu X, Chu Z** (2015) Genome-wide evolutionary characterization and analysis of bZIP  
948 transcription factors and their expression profiles in response to multiple abiotic stresses in  
949 *Brachypodium distachyon*. *BMC Genomics* **16**: 227
- 950 **Lobet G, Pagès L, Draye X** (2011) A novel image-analysis toolbox enabling quantitative  
951 analysis of root system architecture. *Plant Physiol* **157**: 29–39
- 952 **Lourenço TF, Serra TS, Cordeiro AM, Swanson SJ, Gilroy S, Saibo NJM, Oliveira MM**  
953 (2015) The Rice E3-Ubiquitin Ligase HIGH EXPRESSION OF OSMOTICALLY  
954 RESPONSIVE GENE1 Modulates the Expression of ROOT MEANDER CURLING, a  
955 Gene Involved in Root Mechanosensing, through the Interaction with Two ETHYLENE-  
956 RESPONSE FACTOR Transcription Factors. *Plant Physiol* **169**: 2275–2287
- 957 **Love MI, Huber W, Anders S** (2014) Moderated estimation of fold change and dispersion for  
958 RNA-seq data with DESeq2. *Genome Biol* **15**: 550
- 959 **MacKinnon KJ-M, Cole BJ, Yu C, Coomey JH, Hartwick NT, Remigereau M-S, Duffy T,**

- 960 **Michael TP, Kay SA, Hazen SP** (2020) Changes in ambient temperature are the prevailing  
961 cue in determining *Brachypodium distachyon* diurnal gene regulation. *New Phytol* **227**:  
962 1649–1667
- 963 **Martin L, Leblanc-Fournier N, Julien J-L, Moulia B, Coutand C** (2010) Acclimation  
964 kinetics of physiological and molecular responses of plants to multiple mechanical loadings.  
965 *J Exp Bot* **61**: 2403–2412
- 966 **Matos DA, Whitney IP, Harrington MJ, Hazen SP** (2013) Cell walls and the developmental  
967 anatomy of the *Brachypodium distachyon* stem internode. *PLoS One* **8**: e80640
- 968 **McCahill IW, Hazen SP** (2019) Regulation of cell wall thickening by a medley of mechanisms.  
969 *Trends Plant Sci* **24**: 853–866
- 970 **Monshausen GB, Bibikova TN, Weisenseel MH, Gilroy S** (2009) Ca<sup>2+</sup> regulates reactive  
971 oxygen species production and pH during mechanosensing in Arabidopsis roots. *Plant Cell*  
972 **21**: 2341–2356
- 973 **Moore BM, Lee YS, Wang P, Azodi C, Grotewold E, Shiu S-H** (2022) Modeling temporal  
974 and hormonal regulation of plant transcriptional response to wounding. *Plant Cell* **34**: 867–  
975 888
- 976 **Moulia B, Coutand C, Julien J-L** (2015) Mechanosensitive control of plant growth: bearing the  
977 load, sensing, transducing, and responding. *Front Plant Sci* **6**: 52
- 978 **Nam BE, Park Y-J, Gil K-E, Kim J-H, Kim JG, Park C-M** (2020) Auxin mediates the touch-  
979 induced mechanical stimulation of adventitious root formation under windy conditions in  
980 *Brachypodium distachyon*. *BMC Plant Biol* **20**: 335
- 981 **Niez B, Dlouha J, Moulia B, Badel E** (2019) Water-stressed or not, the mechanical acclimation  
982 is a priority requirement for trees. *Trees* **33**: 279–291
- 983 **Ohtani M, Nishikubo N, Xu B, Yamaguchi M, Mitsuda N, Goué N, Shi F, Ohme-Takagi M,**  
984 **Demura T** (2011) A NAC domain protein family contributing to the regulation of wood  
985 formation in poplar. *Plant J* **67**: 499–512
- 986 **Olins JR, Lin L, Lee SJ, Trabucco GM, MacKinnon KJM, Hazen SP** (2018) Secondary wall  
987 regulating NACs differentially bind at the promoter at a *CELLULOSE SYNTHASE A4* cis-  
988 eQTL. *Front Plant Sci* **9**: 1895
- 989 **Oliva M, Dunand C** (2007) Waving and skewing: how gravity and the surface of growth media  
990 affect root development in Arabidopsis. *New Phytol* **176**: 37–43
- 991 **O'Malley RC, Huang S-SC, Song L, Lewsey MG, Bartlett A, Nery JR, Galli M, Gallavotti**  
992 **A, Ecker JR** (2016) Cistrome and epicistrome features shape the regulatory DNA  
993 landscape. *Cell* **165**: 1280–1292
- 994 **Pertea M, Pertea GM, Antonescu CM, Chang T-C, Mendell JT, Salzberg SL** (2015)

- 995 StringTie enables improved reconstruction of a transcriptome from RNA-seq reads. *Nat*  
996 *Biotechnol* **33**: 290–295
- 997 **Pitzschke A, Djamei A, Teige M, Hirt H** (2009) VIP1 response elements mediate mitogen-  
998 activated protein kinase 3-induced stress gene expression. *Proc Natl Acad Sci U S A* **106**:  
999 18414–18419
- 1000 **Polisensky DH, Braam J** (1996) Cold-shock regulation of the Arabidopsis TCH genes and the  
1001 effects of modulating intracellular calcium levels. *Plant Physiol* **111**: 1271–1279
- 1002 **Pomiès L, Decourteix M, Franchel J, Moulia B, Leblanc-Fournier N** (2017) Poplar stem  
1003 transcriptome is massively remodelled in response to single or repeated mechanical stimuli.  
1004 *BMC Genomics* **18**: 300
- 1005 **Raudvere U, Kolberg L, Kuzmin I, Arak T, Adler P, Peterson H, Vilo J** (2019) g:Profiler: a  
1006 web server for functional enrichment analysis and conversions of gene lists. *Nucleic Acids*  
1007 *Res* **47**: W191–W198
- 1008 **Ringli C, Keller B** (1998) Specific interaction of the tomato bZIP transcription factor VSF-1  
1009 with a non-palindromic DNA sequence that controls vascular gene expression. *Plant Mol*  
1010 *Biol* **37**: 977–988
- 1011 **Roignant J, Badel É, Leblanc-Fournier N, Brunel-Michac N, Ruelle J, Moulia B,**  
1012 **Decourteix M** (2018) Feeling stretched or compressed? The multiple mechanosensitive  
1013 responses of wood formation to bending. *Ann Bot* **121**: 1151–1161
- 1014 **Rushton PJ, Reinstädler A, Lipka V, Lippok B, Somssich IE** (2002) Synthetic plant  
1015 promoters containing defined regulatory elements provide novel insights into pathogen- and  
1016 wound-induced signaling. *Plant Cell* **14**: 749–762
- 1017 **Schütze K, Harter K, Chaban C** (2008) Post-translational regulation of plant bZIP factors.  
1018 *Trends Plant Sci* **13**: 247–255
- 1019 **Shah L, Yahya M, Shah SMA, Nadeem M, Ali A, Ali A, Wang J, Riaz MW, Rehman S, Wu**  
1020 **W, et al** (2019) Improving lodging resistance: using wheat and rice as classical examples.  
1021 *Int J Mol Sci*. doi: 10.3390/ijms20174211
- 1022 **Sibout R, Proost S, Hansen BO, Vaid N, Giorgi FM, Ho-Yue-Kuang S, Legée F, Cézart L,**  
1023 **Bouchabké-Coussa O, Soulhat C, et al** (2017) Expression atlas and comparative  
1024 coexpression network analyses reveal important genes involved in the formation of lignified  
1025 cell wall in *Brachypodium distachyon*. *New Phytol* **215**: 1009–1025
- 1026 **Swanson SJ, Barker R, Ye Y, Gilroy S** (2015) Evaluating mechano-transduction and touch  
1027 responses in plant roots. *Methods Mol Biol* **1309**: 143–150
- 1028 **Szczegielniak J, Borkiewicz L, Szurmak B, Lewandowska-Gnatowska E, Statkiewicz M,**  
1029 **Klimecka M, Cieśla J, Muszyńska G** (2012) Maize calcium-dependent protein kinase  
1030 (ZmCPK11): local and systemic response to wounding, regulation by touch and components

- 1031 of jasmonate signaling. *Physiol Plant* **146**: 1–14
- 1032 **Trabucco GM, Matos DA, Lee SJ, Saathoff A, Priest H, Mockler TC, Sarath G, Hazen SP**  
1033 (2013) Functional characterization of cinnamyl alcohol dehydrogenase and caffeic acid *O*-  
1034 methyltransferase in *Brachypodium distachyon*. *BMC Biotechnol* **13**: 61
- 1035 **Trifinopoulos J, Nguyen L-T, von Haeseler A, Minh BQ** (2016) W-IQ-TREE: a fast online  
1036 phylogenetic tool for maximum likelihood analysis. *Nucleic Acids Res* **44**: W232–W235
- 1037 **Tsugama D, Liu S, Fujino K, Takano T** (2018) Calcium signalling regulates the functions of  
1038 the bZIP protein VIP1 in touch responses in *Arabidopsis thaliana*. *Ann Bot* **122**: 1219–1229
- 1039 **Tsugama D, Liu S, Takano T** (2012) A bZIP protein, VIP1, is a regulator of osmosensory  
1040 signaling in *Arabidopsis*. *Plant Physiol* **159**: 144–155
- 1041 **Tsugama D, Liu S, Takano T** (2016) The bZIP protein VIP1 Is involved in touch responses in  
1042 *Arabidopsis* roots. *Plant Physiol* **171**: 1355–1365
- 1043 **Tsugama D, Liu S, Takano T** (2014) Analysis of functions of VIP1 and its close homologs in  
1044 osmosensory responses of *Arabidopsis thaliana*. *PLoS One* **9**: e103930
- 1045 **Tyler L, Bragg JN, Wu J, Yang X, Tuskan GA, Vogel JP** (2010) Annotation and comparative  
1046 analysis of the glycoside hydrolase genes in *Brachypodium distachyon*. *BMC Genomics* **11**:  
1047 600
- 1048 **Uyttewaal M, Burian A, Alim K, Landrein B, Borowska-Wykręć D, Dedieu A, Peaucelle A,**  
1049 **Ludynia M, Traas J, Boudaoud A, et al** (2012) Mechanical stress acts via katanin to  
1050 amplify differences in growth rate between adjacent cells in *Arabidopsis*. *Cell* **149**: 439–451
- 1051 **Valdivia ER, Herrera MT, Gianzo C, Fidalgo J, Revilla G, Zarra I, Sampedro J** (2013)  
1052 Regulation of secondary wall synthesis and cell death by NAC transcription factors in the  
1053 monocot *Brachypodium distachyon*. *J Exp Bot* **64**: 1333–1343
- 1054 **Van Leene J, Blomme J, Kulkarni SR, Cannoot B, De Winne N, Eeckhout D, Persiau G,**  
1055 **Van De Slijke E, Vercruyse L, Vanden Bossche R, et al** (2016) Functional  
1056 characterization of the *Arabidopsis* transcription factor bZIP29 reveals its role in leaf and  
1057 root development. *J Exp Bot* **67**: 5825–5840
- 1058 **Van Moerkercke A, Duncan O, Zander M, Šimura J, Broda M, Vanden Bossche R, Lewsey**  
1059 **MG, Lama S, Singh KB, Ljung K, et al** (2019) A MYC2/MYC3/MYC4-dependent  
1060 transcription factor network regulates water spray-responsive gene expression and  
1061 jasmonate levels. *Proc Natl Acad Sci U S A* **116**: 23345–23356
- 1062 **Walley J, Coughlan S, Hudson ME, Covington MF, Kaspi R, Banu G, Harmer SL, Dehesh**  
1063 **K** (2007) Mechanical stress induces biotic and abiotic stress responses via a novel cis-  
1064 element. *PLoS Genet* **3**: 1800–1812
- 1065 **Weltmeier F, Ehlert A, Mayer CS, Dietrich K, Wang X, Schütze K, Alonso R, Harter K,**

- 1066 **Vicente-Carbajosa J, Dröge-Laser W** (2006) Combinatorial control of Arabidopsis  
1067 proline dehydrogenase transcription by specific heterodimerisation of bZIP transcription  
1068 factors. *EMBO J* **25**: 3133–3143
- 1069 **Yin Y, Zhu Q, Dai S, Lamb C, Beachy RN** (1997) RF2a, a bZIP transcriptional activator of the  
1070 phloem-specific rice tungro bacilliform virus promoter, functions in vascular development.  
1071 *EMBO J* **16**: 5247–5259
- 1072 **Zha G, Wang B, Liu J, Yan J, Zhu L, Yang X** (2016) Mechanical touch responses of  
1073 Arabidopsis TCH1-3 mutant roots on inclined hard-agar surface. *International Agrophysics*  
1074 **30**: 65
- 1075 **Zhong R, Lee C, McCarthy RL, Reeves CK, Jones EG, Ye Z-H** (2011) Transcriptional  
1076 activation of secondary wall biosynthesis by rice and maize NAC and MYB transcription  
1077 factors. *Plant Cell Physiol* **52**: 1856–1871
- 1078 **Zhong R, Ye Z-H** (2012) MYB46 and MYB83 bind to the SMRE sites and directly activate a  
1079 suite of transcription factors and secondary wall biosynthetic genes. *Plant Cell Physiol* **53**:  
1080 368–380
- 1081

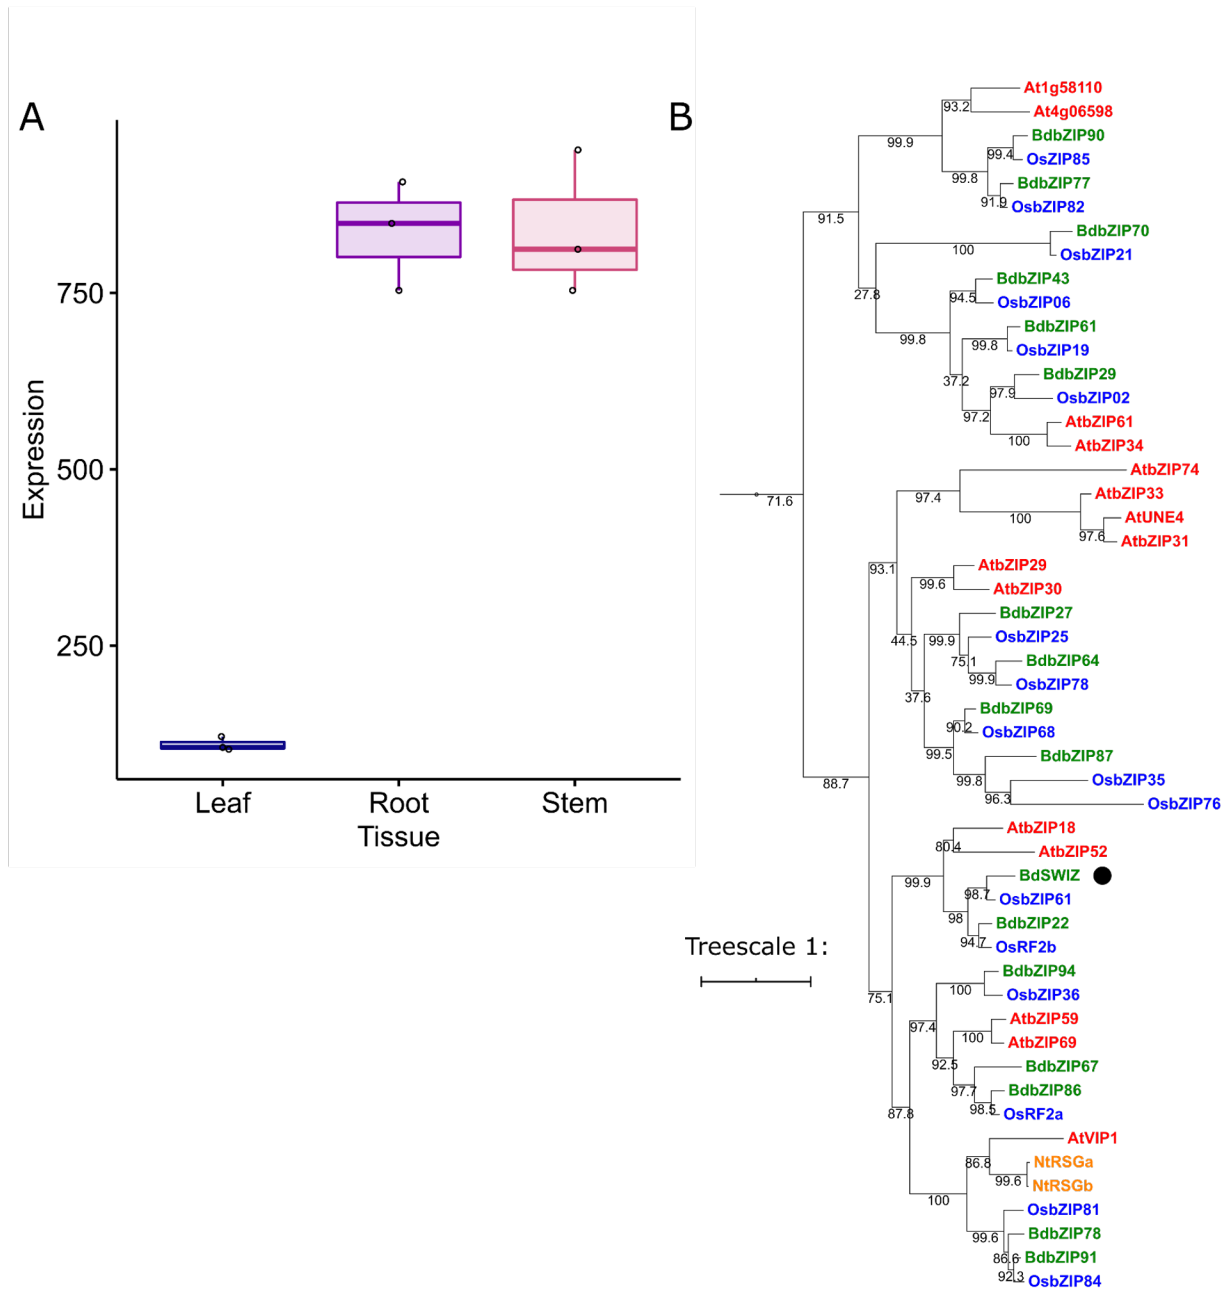

**Figure 1. SWIZ is a Group I bZIP highly expressed in maturing stem and root.** (A) SWIZ transcript abundance in *Brachypodium distachyon* leaf, root, and stem tissue measured by microarray. Mean  $\pm$  standard deviation of three biological replicates. (B) Phylogeny analysis of amino acid sequences from *B. distachyon* (green), *Oryza sativa* (blue), *Arabidopsis thaliana* (red), *Nicotiana tabacum* (orange) shows SWIZ (black dot). The phylogeny was reconstructed using maximum likelihood analysis with a bootstrap resampling value of 1000. The numbers labeled on the branches are the posterior probability to support each clade. The protein sequences, full locus IDs, and plant species with genome source are provided in Supplemental File 1.

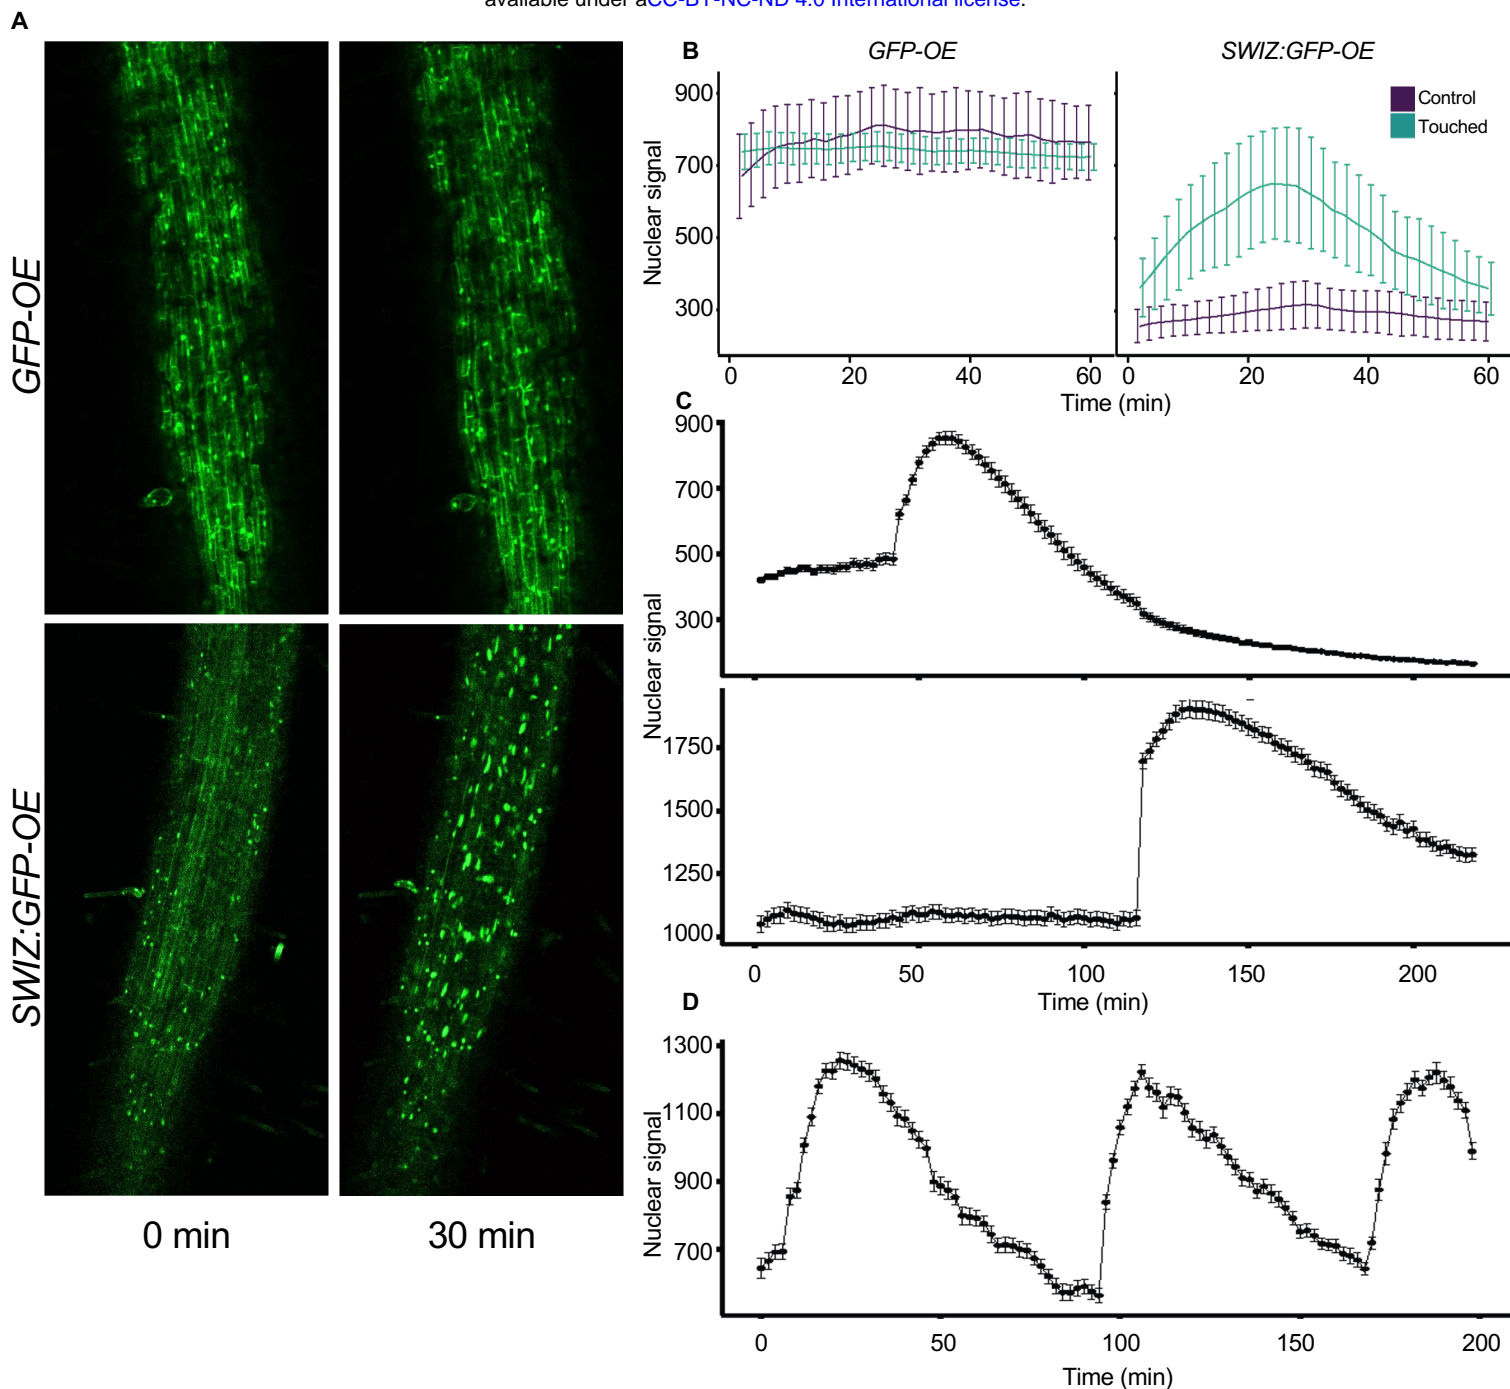

**Figure 2. SWIZ translocates to the nucleus in response to mechanical stimulus, specifically in regions directly stimulated.** (A) Image of *SWIZ:GFP-OE* and *GFP-OE* roots prior to stimulus and 30 min post stimulus. Roots were observed immediately following mechanical perturbation. (B) Quantification of nuclear signal in control (purple) and touched (teal) conditions for *GFP-OE* (left) and *SWIZ:GFP-OE* (right).  $n = 14-20$  nuclei. (C) *SWIZ* translocation occurred in the local area of the stimulus. At 30 min, stimulus was applied to an upper region of the root, while at 120 min it was applied to a lower region approximately 3 cm below.  $n = 109, 184$  nuclei respectively for upper and lower regions. (D) *SWIZ:GFP-OE* roots were imaged by confocal microscopy with stimulus applied in the field of view at 0, 90, and 180 min.  $n = 126$  nuclei. (B-D) Images were taken every 2 min. Nuclear GFP signal was quantified in selected nuclei at each time point. The average nuclear GFP signal is represented by the line with error bars indicating standard error of the mean.

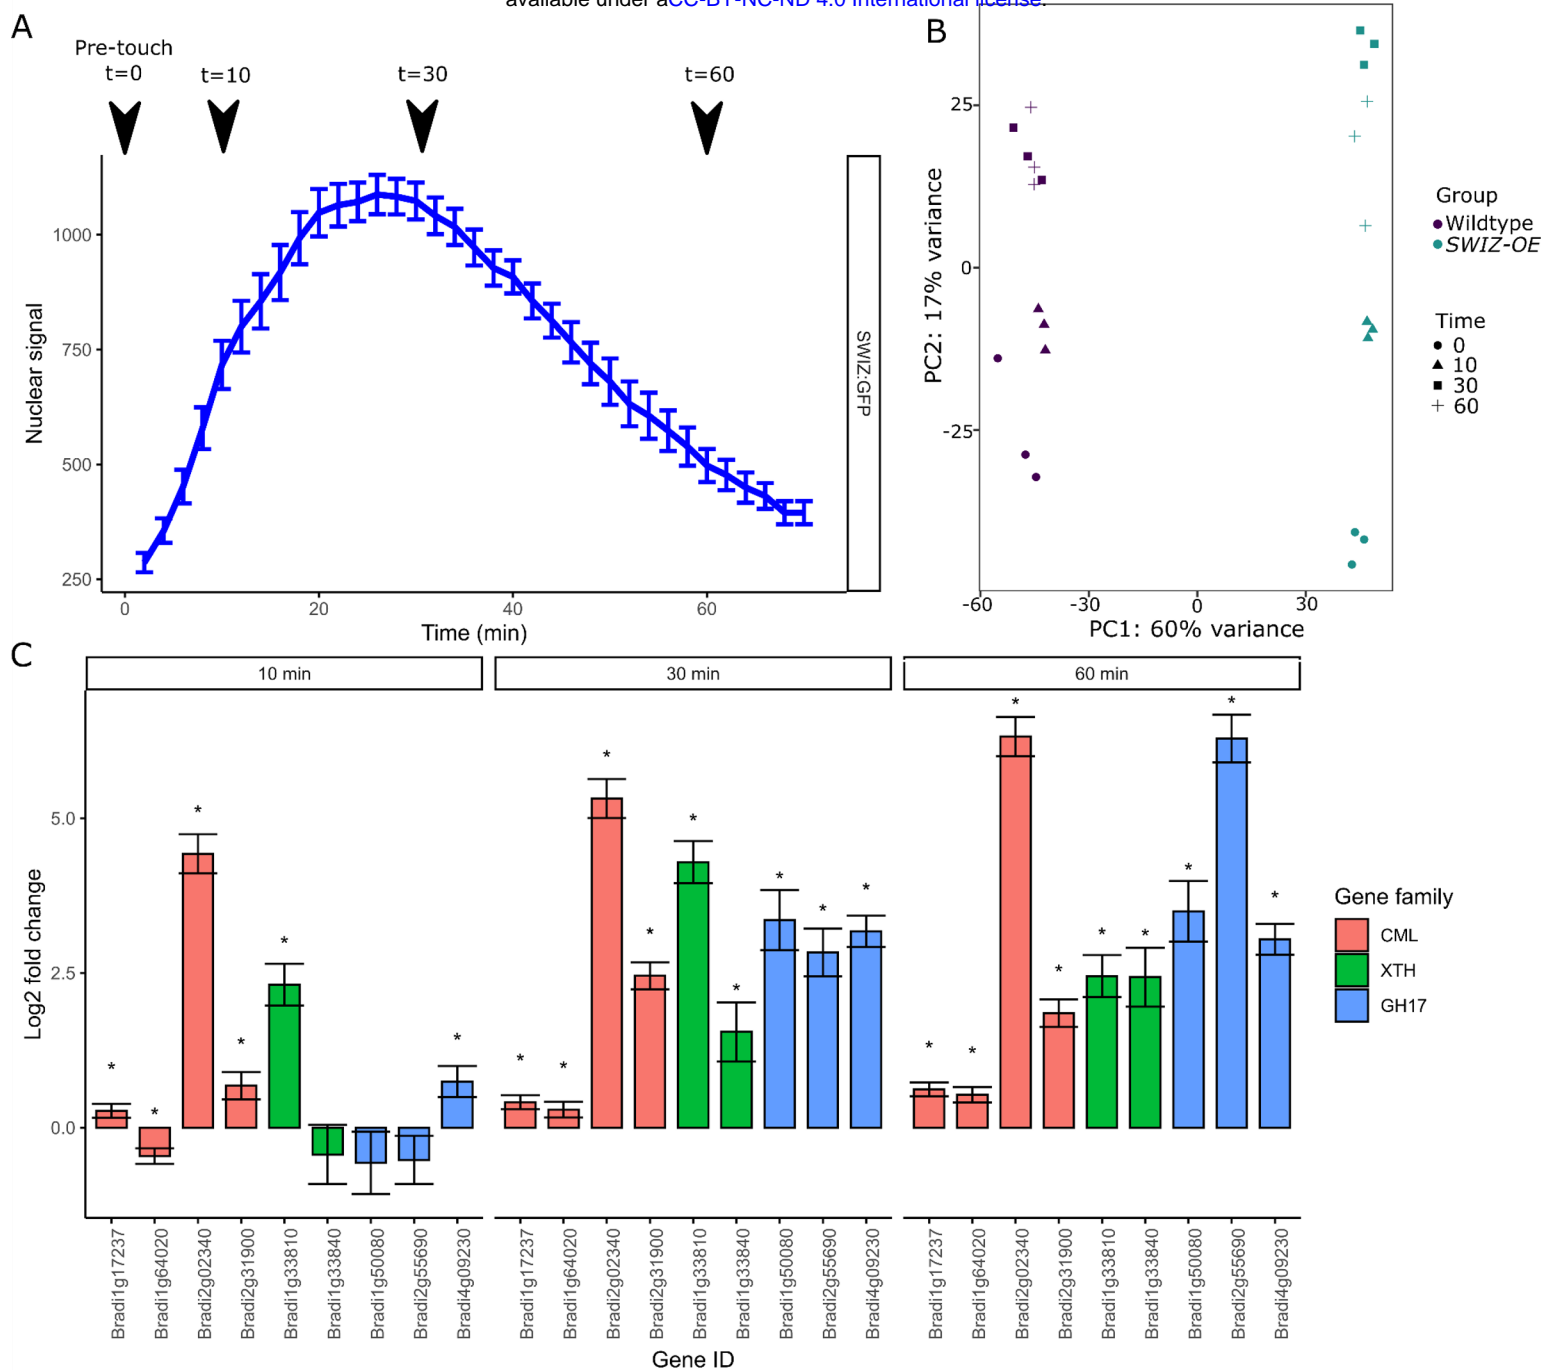

**Figure 3. Transcriptome analysis of touch response in *Brachypodium distachyon* roots.** (A) Root tissue was sampled just prior to touch (t = 0), and at 10, 30, and 60 min following touch treatment in wildtype and SWIZ-OE. (B) Principal component analysis of gene expression across samples shows the greatest difference corresponding to genotype and the second greatest corresponding to time after touch. (C) Canonical, as well as novel touch responsive genes are upregulated in *B. distachyon* following touch. Closest orthologs of the *Arabidopsis thaliana* TOUCH genes encoding calmodulin-like (CML) and xyloglucan endo-transglycosylase/hydrolases (XTH) are upregulated following touch, as are previously unreported members of the glycosyl hydrolase 17 (GH17) family. Full list of gene expression for TOUCH and glycoside hydrolases defined by Tyler et al. (2010) in Supplemental Tables 5, 6, and 7. Significance denoted by \* reflecting  $q < 0.1$  compared to expression at t = 0, with q-values representing Wald test p-values adjusted for false discovery rate.



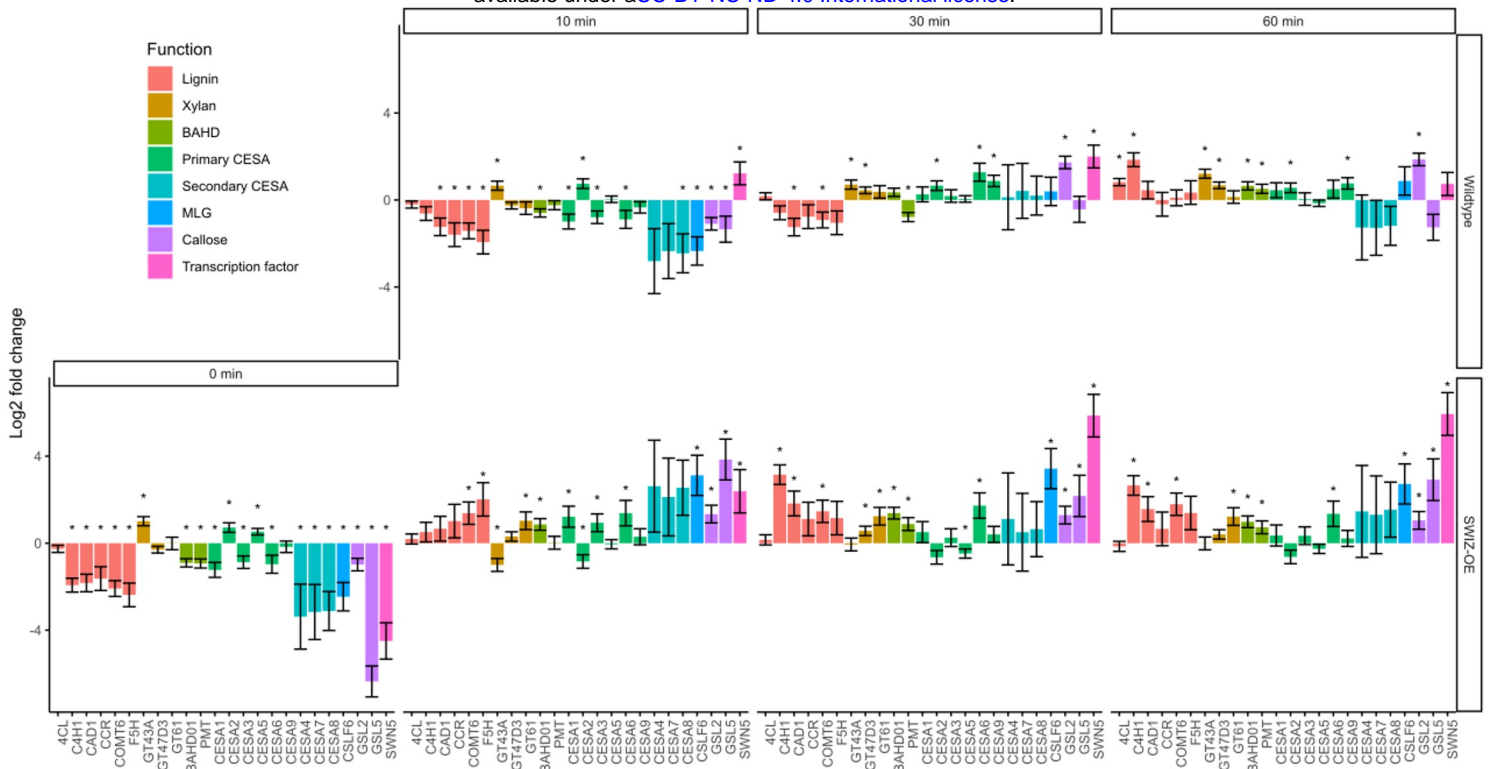

**Figure 4. Gene expression analysis of cell wall related genes.** Log fold-change of gene expression measured by RNA-seq in wildtype and *SWIZ-OE*, presented as relative to wildtype expression at time 0, pre-touch. Bar color indicates class of cell wall gene. Error bars indicate standard deviation of three biological replicates. Significance denoted by \* reflecting  $q < 0.1$  compared to wildtype expression at  $t = 0$ , with  $q$ -values representing Wald test  $p$ -values adjusted for false discovery rate. Legend abbreviations: BAHD, BAHD (BEAT, AHCT, HCBT, and DAT) acyltransferases; CESA, cellulose synthase; MLG, mixed-linkage glucans.

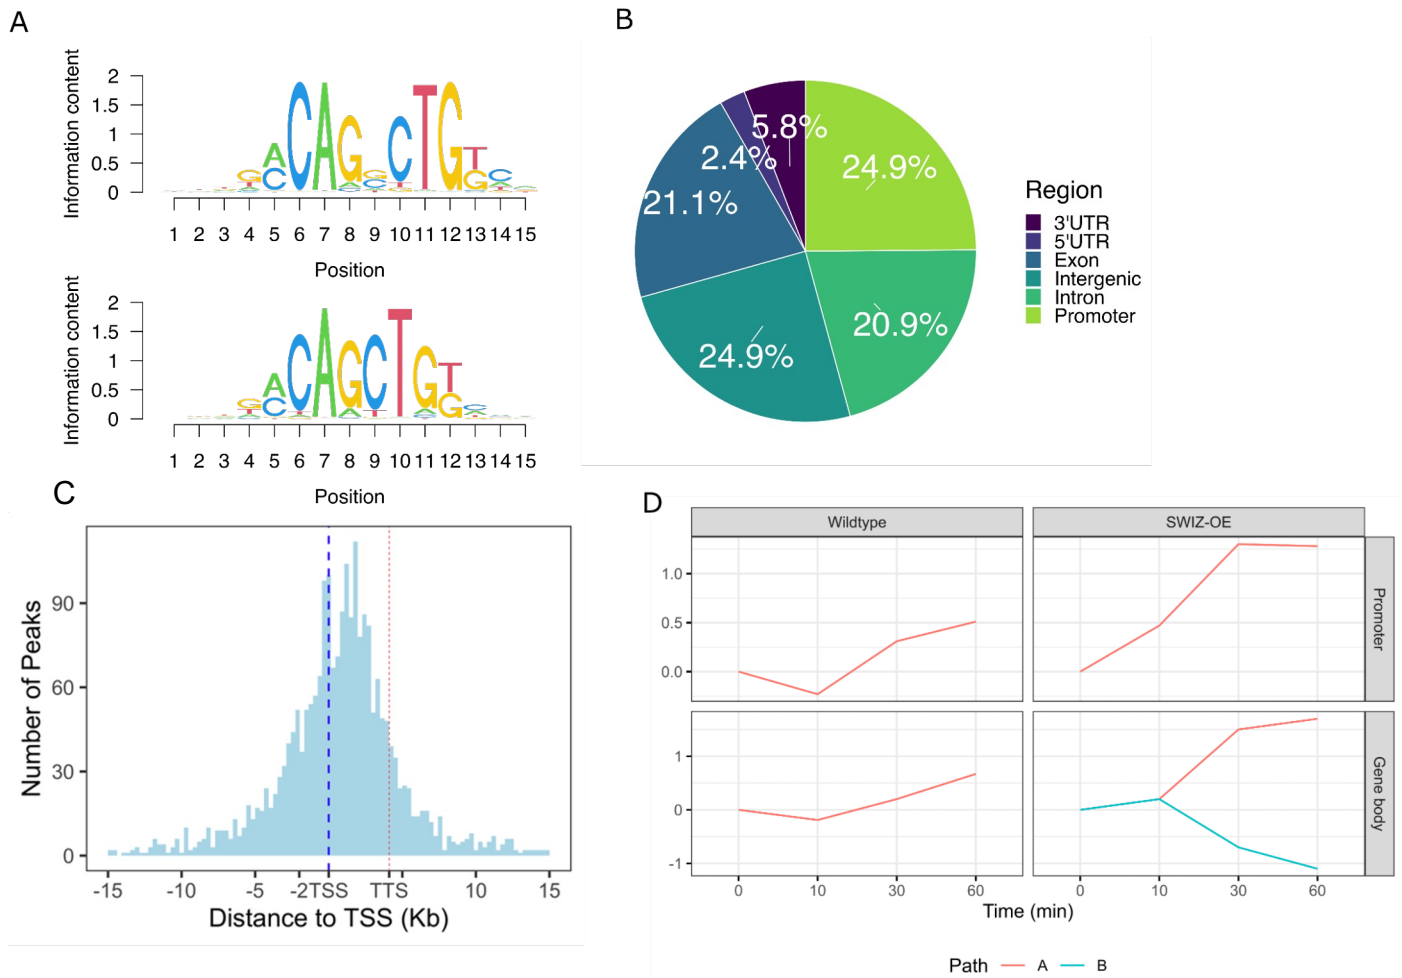

**Figure 5. DNA affinity purification sequencing to determine SWIZ binding sites.** (A) Top two most statistically enriched sequence motifs in SWIZ binding sites. (B) Distribution of binding sites across genomic features, relative to primary transcripts of the *Brachypodium distachyon* annotation v 3.1. (C) Relative distribution of binding sites centered on the transcriptional start site (TSS, blue dashed line), transcriptional termination site (TTS, red dashed line) represents the average length of all annotated transcripts, approximately 4.5 kb away from the TSS. (D) Path determinations from iDREM time course analysis of differentially expressed genes that also have DAP-seq binding sites. Each line represents a set of genes with similar expression level patterns over the time course relative to time 0, pre-touch.

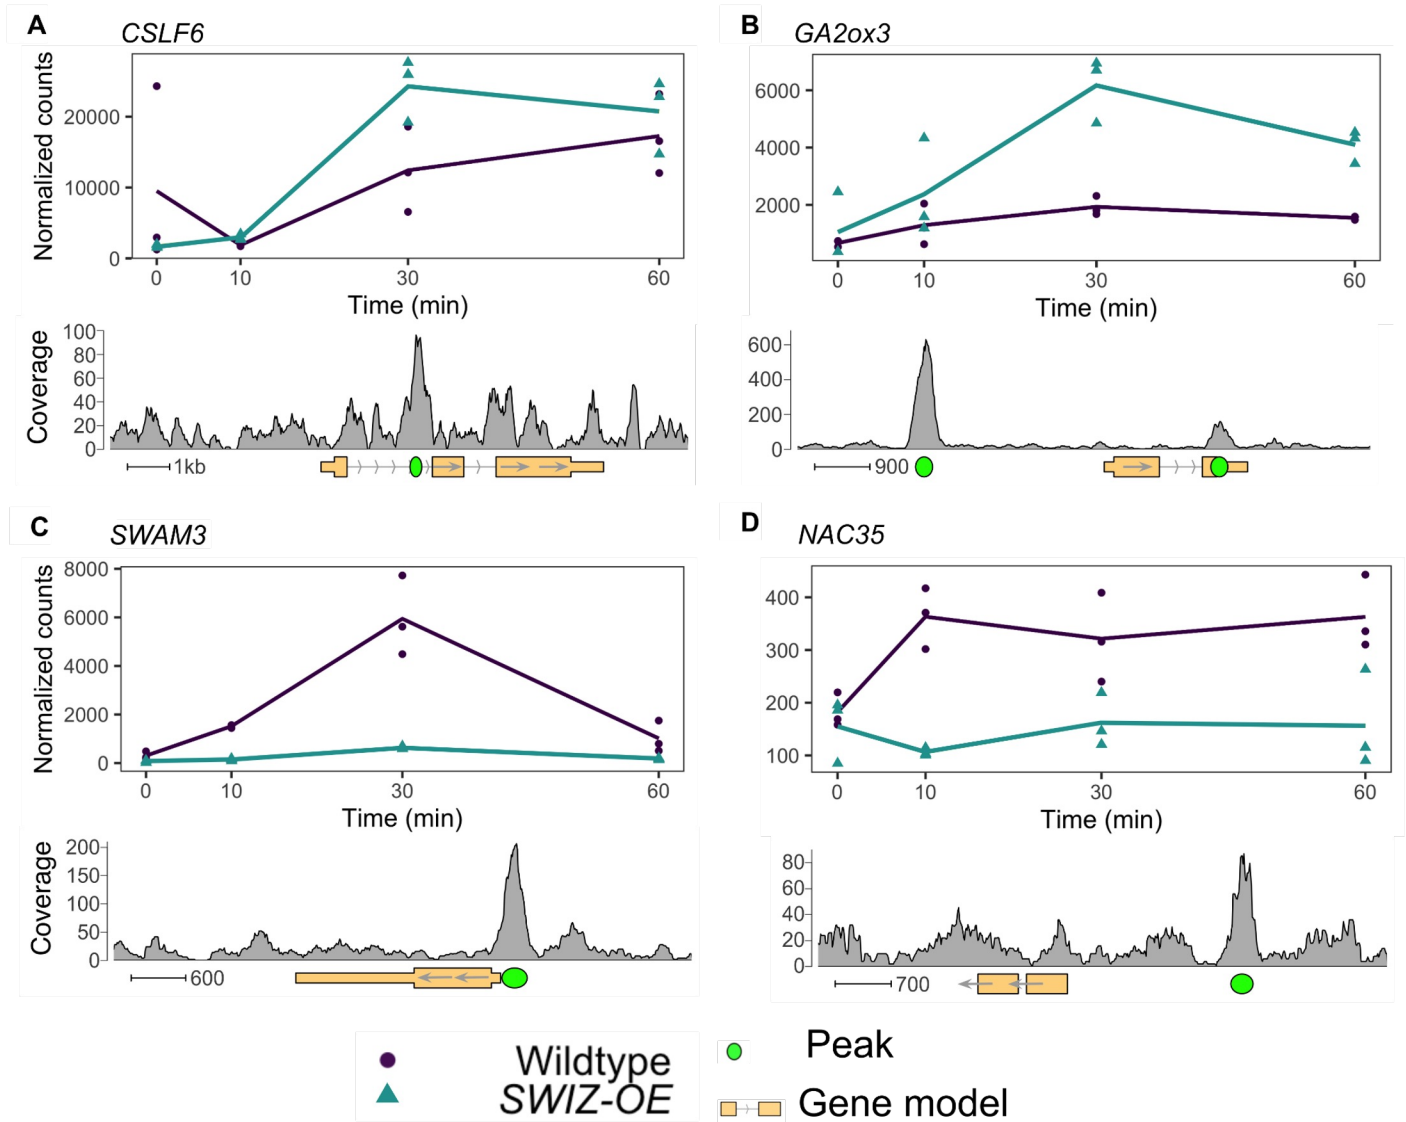

**Figure 6. SWIZ binding targets differentially expressed in response to touch and SWIZ-OE.** Gene expression over time of selected genes with SWIZ binding sites. Line graphs are the average transcript abundance of three biological replicates for each time point. Binding site determined as peaks of sequence alignment. Scale bar unit is bases. Direction of transcription is shown with arrows on the gene model, 5' and 3' UTRs are depicted by narrowed rectangles on the gene model.

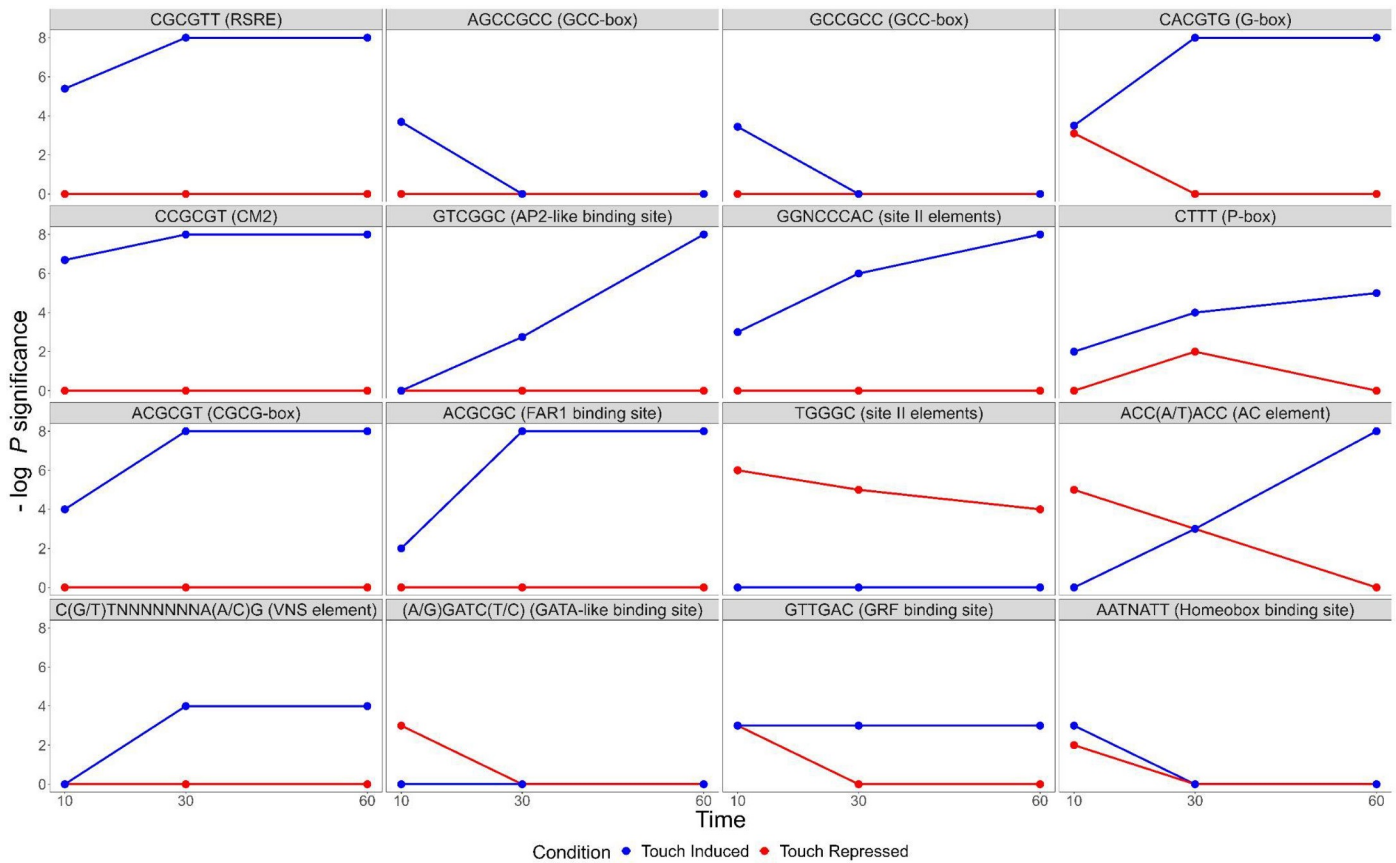

**Figure 7. Sequence motifs enriched in the *cis*-regulatory regions of touch responsive *Brachypodium distachyon* genes.** Negative log *p*-values for *cis*-elements, known and not known to be touch responsive. RSRE - Rapid Stress Response Element, FAR1 - FAR-RED impaired response1, GRF - Growth Regulating Factor, VNS - VND, NST/SND, SMB.

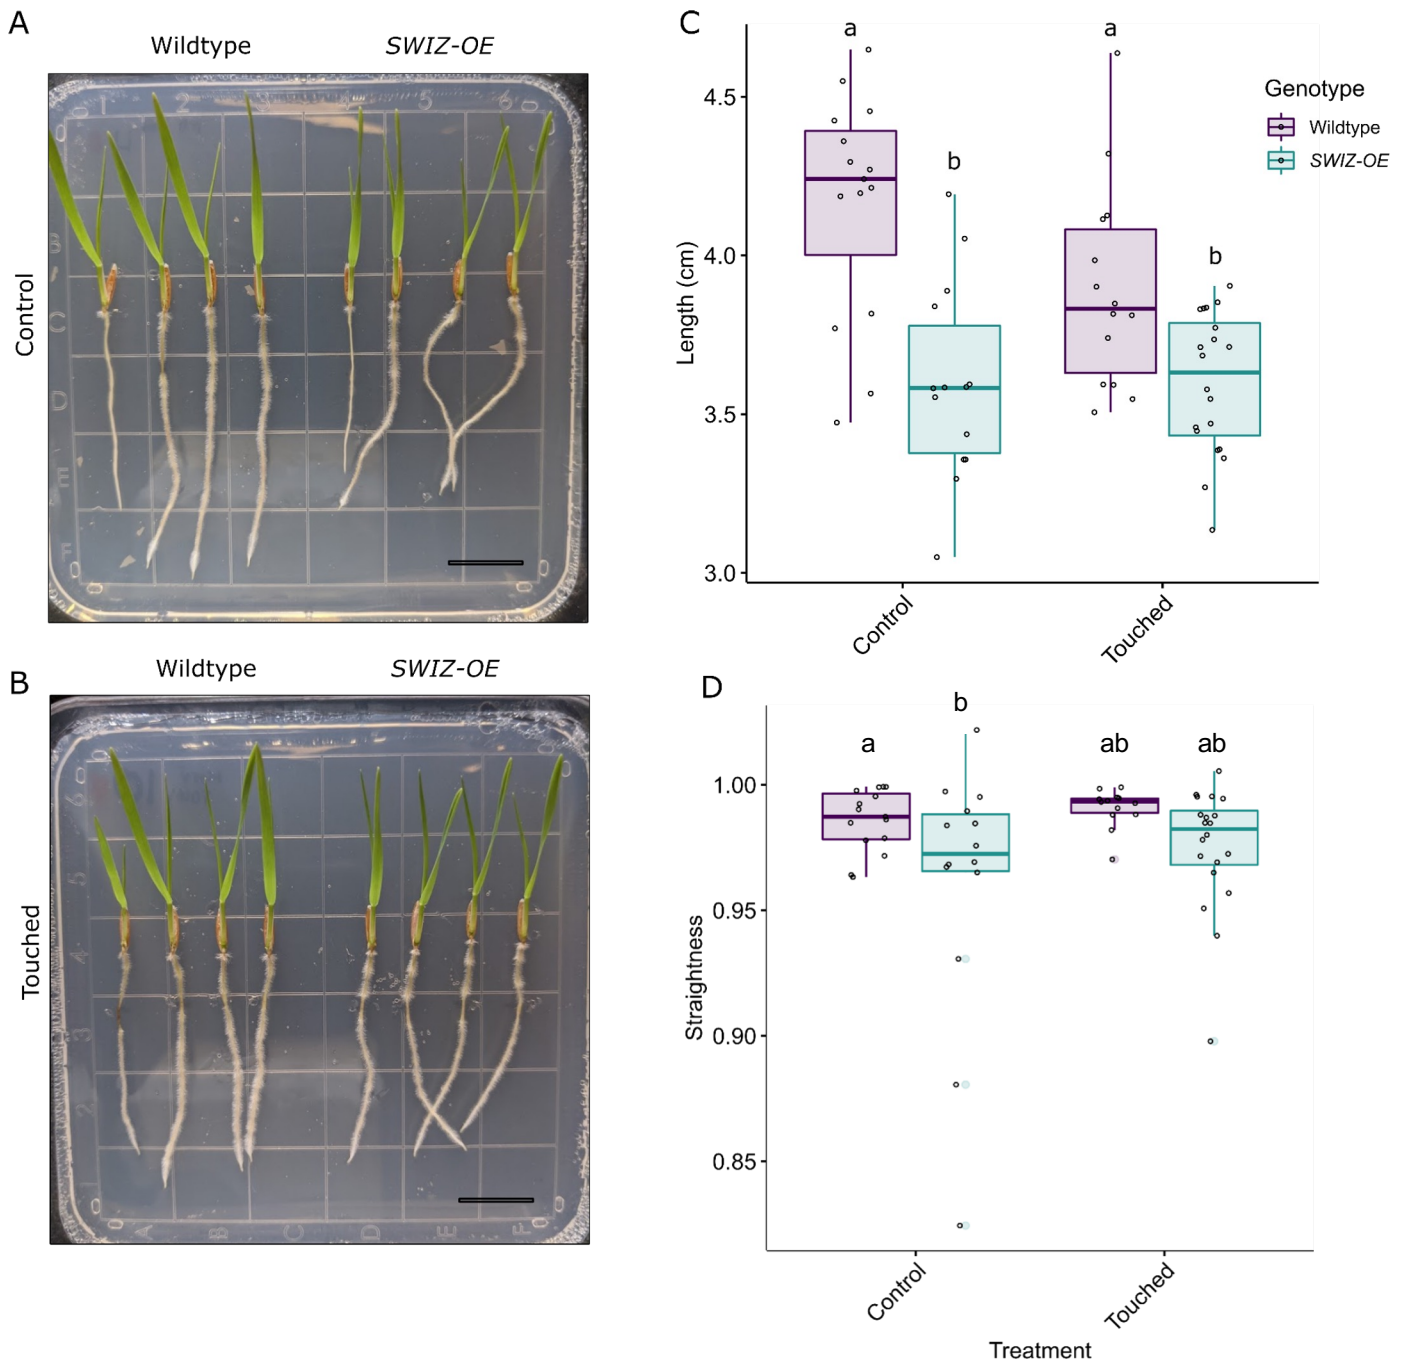

**Figure 8. *SWIZ-OE* roots are shorter than wildtype with no significant difference in straightness in response to direct touch.** Wildtype and *SWIZ-OE* seedlings grown on plates under control (A) or touched (B) conditions for five days. Touched plants were probed with a pipette tip twice a day. (C) Quantification of root length in control and touched conditions. Significance denoted by compact letter display reflecting Tukey HSD adjusted  $p$  values  $< 0.05$ . (D) Quantification of root straightness in control and touch conditions. Significance denoted by \* reflecting Wilcoxon sign-ranked test for non-parametric data with  $p$ -value  $< 0.05$ , ns = not significant. Scale bar = 1 cm.

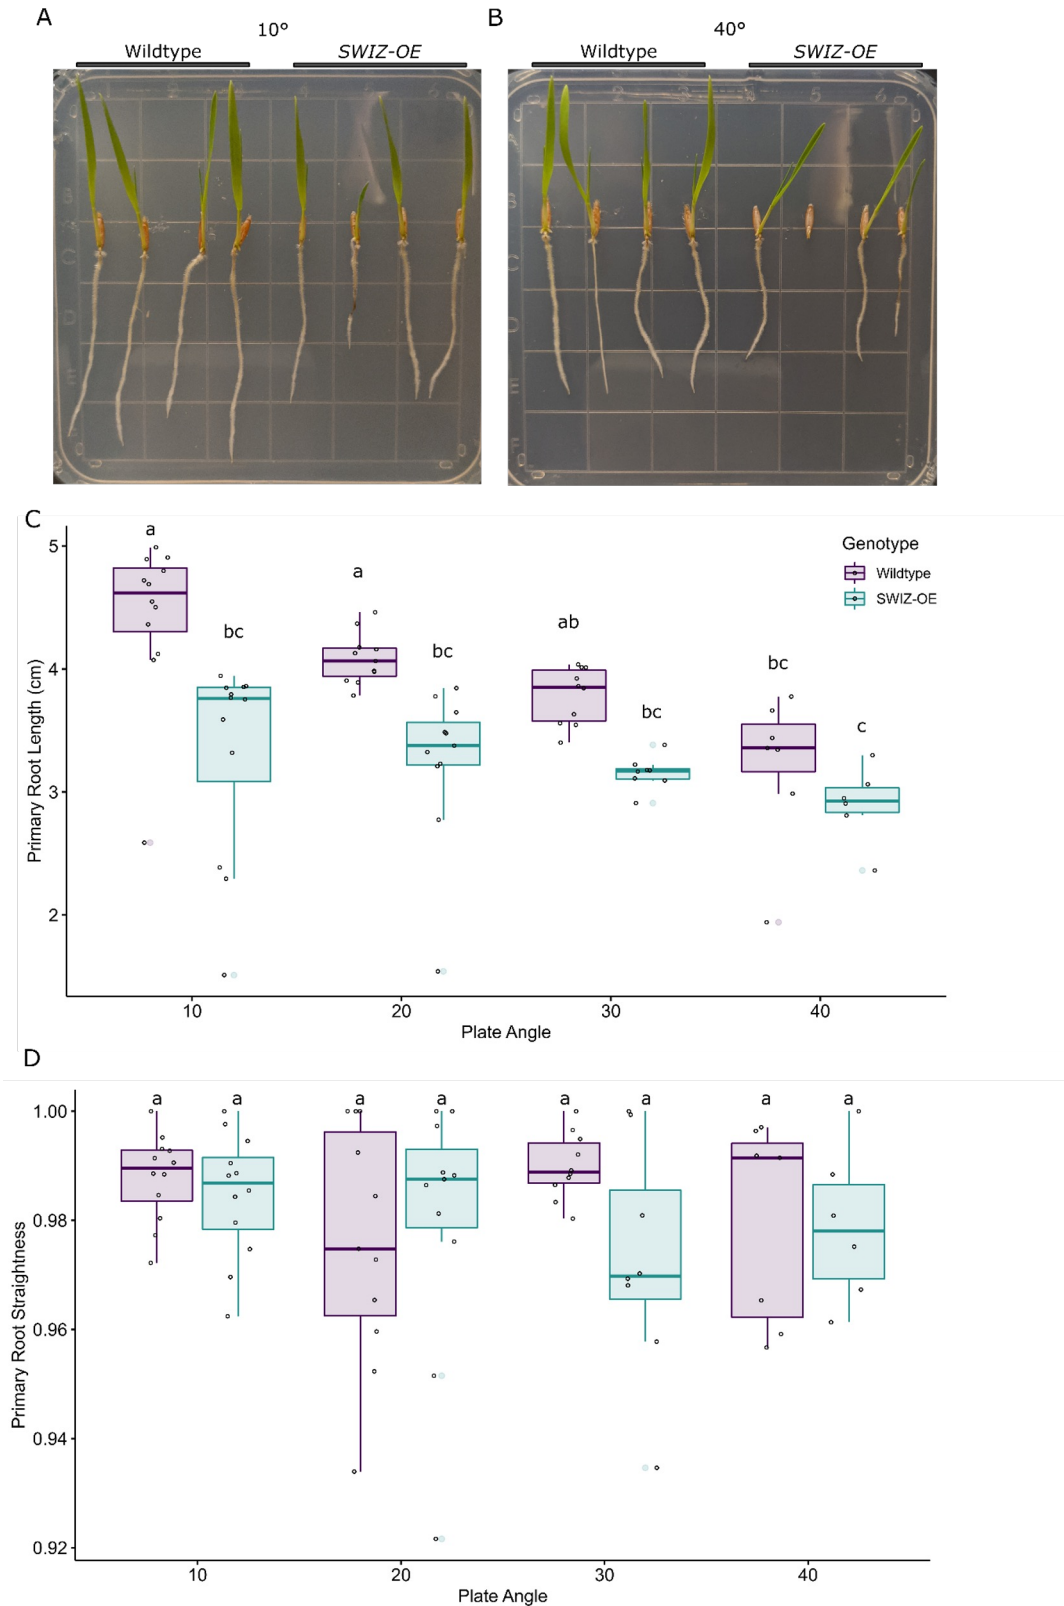

**Figure 9. Wildtype roots shorten with increasing plate angle, while SWIZ-OE roots are consistently short, with no significant difference in straightness.** Wildtype and SWIZ-OE seedlings grown on plates at (A) 10°, 20°, 30°, and (B) 40° incline from vertical. (C) Quantification of root length. (D) Quantification of primary root straightness. Significance denoted by compact letter display reflecting Tukey HSD adjusted  $p$ -values < 0.05. Scale bar = 1 cm.

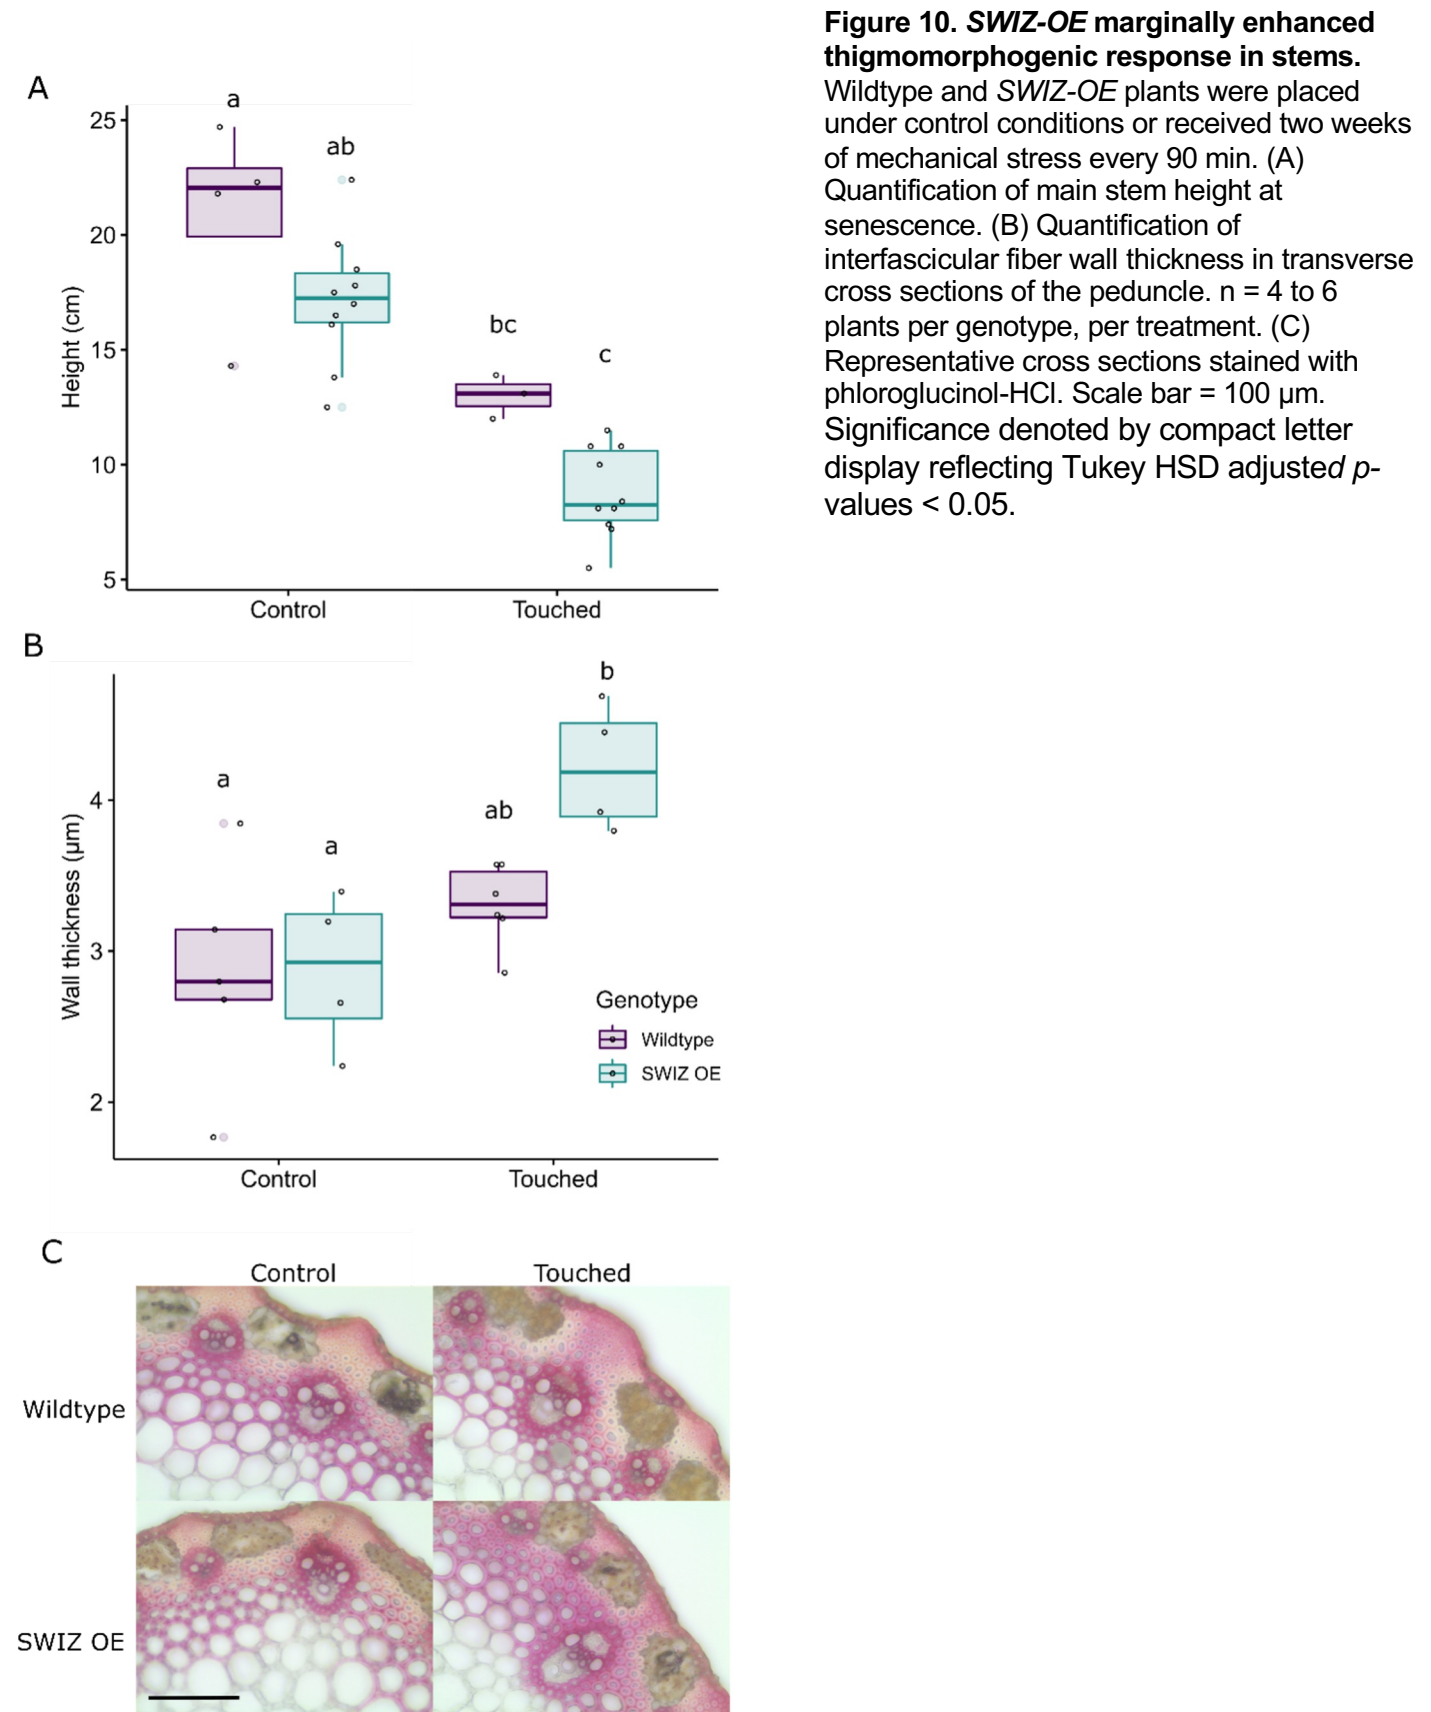

## Parsed Citations

- Altartouri B, Bidhendi AJ, Tani T, Suzuki J, Conrad C, Chebli Y, Liu N, Karunakaran C, Scarcelli G, Geitmann A (2019) Pectin chemistry and cellulose crystallinity govern pavement cell morphogenesis in a multi-step mechanism. *Plant Physiol* 181: 127–141**  
Google Scholar: [Author Only](#) [Title Only](#) [Author and Title](#)
- Andrews S (2010) FastQC: a quality control tool for high throughput sequence data. <http://www.bioinformatics.babraham.ac.uk/projects/fastqc>:**  
Google Scholar: [Author Only](#) [Title Only](#) [Author and Title](#)
- Bidhendi AJ, Altartouri B, Gosselin FP, Geitmann A (2019) Mechanical stress initiates and sustains the morphogenesis of wavy leaf epidermal cells. *Cell Rep* 28: 1237–1250.e6**  
Google Scholar: [Author Only](#) [Title Only](#) [Author and Title](#)
- Bidhendi AJ, Geitmann A (2018) Finite element modeling of shape changes in plant cells. *Plant Physiol* 176: 41–56**  
Google Scholar: [Author Only](#) [Title Only](#) [Author and Title](#)
- Biro RL, Hunt ER, Erner Y, Jaffe MJ (1980) Thigmomorphogenesis: changes in cell division and elongation in the internodes of mechanically-perturbed or ethrel-treated bean plants. *Ann Bot* 45: 655–664**  
Google Scholar: [Author Only](#) [Title Only](#) [Author and Title](#)
- Börnke F, Rocksch T (2018) Thigmomorphogenesis – Control of plant growth by mechanical stimulation. *Sci Hortic* 234: 344–353**  
Google Scholar: [Author Only](#) [Title Only](#) [Author and Title](#)
- Braam J (2004) In touch: plant responses to mechanical stimuli. *New Phytol* 165: 373–389**  
Google Scholar: [Author Only](#) [Title Only](#) [Author and Title](#)
- Braam J, Davis RW (1990) Rain-, wind-, and touch-induced expression of calmodulin and calmodulin-related genes in *Arabidopsis*. *Cell* 60: 357–364**  
Google Scholar: [Author Only](#) [Title Only](#) [Author and Title](#)
- Chehab EW, Eich E, Braam J (2009) Thigmomorphogenesis: a complex plant response to mechano-stimulation. *J Exp Bot* 60: 43–56**  
Google Scholar: [Author Only](#) [Title Only](#) [Author and Title](#)
- Coomey JH, Sibout R, Hazen SP (2020) Grass secondary cell walls, *Brachypodium distachyon* as a model for discovery. *New Phytol* 227: 1709–1724**  
Google Scholar: [Author Only](#) [Title Only](#) [Author and Title](#)
- Coutand C, Martin L, Leblanc-Fournier N, Decourteix M, Julien J-L, Moulia B (2009) Strain mechanosensing quantitatively controls diameter growth and PtaZFP2 gene expression in poplar. *Plant Physiol* 151: 223–232**  
Google Scholar: [Author Only](#) [Title Only](#) [Author and Title](#)
- Deppmann CD, Acharya A, Rishi V, Wobbes B, Smeekens S, Taparowsky EJ, Vinson C (2004) Dimerization specificity of all 67 B-ZIP motifs in *Arabidopsis thaliana*: a comparison to *Homo sapiens* B-ZIP motifs. *Nucleic Acids Res* 32: 3435–3445**  
Google Scholar: [Author Only](#) [Title Only](#) [Author and Title](#)
- Ding J, Hagood JS, Ambalavanan N, Kaminski N, Bar-Joseph Z (2018) iDREM: Interactive visualization of dynamic regulatory networks. *PLoS Comput Biol* 14: e1006019**  
Google Scholar: [Author Only](#) [Title Only](#) [Author and Title](#)
- Doherty CJ, Van Buskirk HA, Myers SJ, Thomashow MF (2009) Roles for *Arabidopsis* CAMTA transcription factors in cold-regulated gene expression and freezing tolerance. *Plant Cell* 21: 972–984**  
Google Scholar: [Author Only](#) [Title Only](#) [Author and Title](#)
- Dröge-Laser W, Snoek BL, Snel B, Weiste C (2018) The *Arabidopsis* bZIP transcription factor family—an update. *Curr Opin Plant Biol* 45: 36–49**  
Google Scholar: [Author Only](#) [Title Only](#) [Author and Title](#)
- Ehlert A, Weltmeier F, Wang X, Mayer CS, Smeekens S, Vicente-Carbajosa J, Dröge-Laser W (2006) Two-hybrid protein-protein interaction analysis in *Arabidopsis* protoplasts: establishment of a heterodimerization map of group C and group S bZIP transcription factors. *Plant J* 46: 890–900**  
Google Scholar: [Author Only](#) [Title Only](#) [Author and Title](#)
- Fernández-Calvo P, Chini A, Fernández-Barbero G, Chico J-M, Gimenez-Ibanez S, Geerinck J, Eeckhout D, Schweizer F, Godoy M, Franco-Zorrilla JM, et al (2011) The *Arabidopsis* bHLH transcription factors MYC3 and MYC4 are targets of JAZ repressors and act additively with MYC2 in the activation of jasmonate responses. *Plant Cell* 23: 701–715**  
Google Scholar: [Author Only](#) [Title Only](#) [Author and Title](#)
- Fukazawa J, Nakata M, Ito T, Matsushita A, Yamaguchi S, Takahashi Y (2011) bZIP transcription factor RSG controls the feedback**



**regulation of NtGA20ox1 via intracellular localization and epigenetic mechanism. Plant Signal Behav 6: 26–28**

Google Scholar: [Author Only](#) [Title Only](#) [Author and Title](#)

**Fukazawa J, Nakata M, Ito T, Yamaguchi S, Takahashi Y (2010) The transcription factor RSG regulates negative feedback of NtGA20ox1 encoding GA 20-oxidase. Plant J 62: 1035–1045**

Google Scholar: [Author Only](#) [Title Only](#) [Author and Title](#)

**Fukazawa J, Sakai T, Ishida S, Yamaguchi I, Kamiya Y, Takahashi Y (2000) Repression of shoot growth, a bZIP transcriptional activator, regulates cell elongation by controlling the level of gibberellins. Plant Cell 12: 901–915**

Google Scholar: [Author Only](#) [Title Only](#) [Author and Title](#)

**Gibalová A, Steinbachová L, Hafidh S, Bláhová V, Gadiou Z, Michailidis C, Müller K, Pleskot R, Dupřáková N, Honys D (2017) Characterization of pollen-expressed bZIP protein interactions and the role of ATbZIP18 in the male gametophyte. Plant Reprod 30: 1–17**

Google Scholar: [Author Only](#) [Title Only](#) [Author and Title](#)

**Gladala-Kostarz A, Doonan JH, Bosch M (2020) Mechanical stimulation in Brachypodium distachyon: implications for fitness, productivity and cell wall properties. Plant Cell Environ 43: 1314–1330**

Google Scholar: [Author Only](#) [Title Only](#) [Author and Title](#)

**Grigoryan G, Keating AE (2006) Structure-based prediction of bZIP partnering specificity. J Mol Biol 355: 1125–1142**

Google Scholar: [Author Only](#) [Title Only](#) [Author and Title](#)

**Hamant O, Heisler MG, Jönsson H, Krupinski P, Uyttewaal M, Bokov P, Corson F, Sahlín P, Boudaoud A, Meyerowitz EM, et al (2008) Developmental patterning by mechanical signals in Arabidopsis. Science 322: 1650–1655**

Google Scholar: [Author Only](#) [Title Only](#) [Author and Title](#)

**Handakumbura P, Matos D, Osmont K, Harrington M, Heo K, Kafle K, Kim S, Baskin T, Hazen S (2013) Perturbation of Brachypodium distachyon CELLULOSE SYNTHASE A4 or 7 results in abnormal cell walls. BMC Plant Biol 13: 131**

Google Scholar: [Author Only](#) [Title Only](#) [Author and Title](#)

**Handakumbura PP, Brow K, Whitney IP, Zhao K, Sanguinet KA, Lee SJ, Olins J, Romero-Gamboa SP, Harrington MJ, Bascom CJ, et al (2018) SECONDARY WALL ASSOCIATED MYB1 is a positive regulator of secondary cell wall thickening in Brachypodium distachyon and is not found in the Brassicaceae. Plant J 96: 485–699**

Google Scholar: [Author Only](#) [Title Only](#) [Author and Title](#)

**Heinz S, Benner C, Spann N, Bertolino E, Lin YC, Laslo P, Cheng JX, Murre C, Singh H, Glass CK (2010) Simple combinations of lineage-determining transcription factors prime cis-regulatory elements required for macrophage and B cell identities. Mol Cell 38: 576–589**

Google Scholar: [Author Only](#) [Title Only](#) [Author and Title](#)

**Igarashi D, Ishida S, Fukazawa J, Takahashi Y (2001) 14-3-3 proteins regulate intracellular localization of the bZIP transcriptional activator RSG. Plant Cell 13: 2483–2497**

Google Scholar: [Author Only](#) [Title Only](#) [Author and Title](#)

**Iida H (2014) Mugifumi, a beneficial farm work of adding mechanical stress by treading to wheat and barley seedlings. Front Plant Sci 5: 453**

Google Scholar: [Author Only](#) [Title Only](#) [Author and Title](#)

**Ishida S, Fukazawa J, Yuasa T, Takahashi Y (2004) Involvement of 14-3-3 signaling protein binding in the functional regulation of the transcriptional activator REPRESSION OF SHOOT GROWTH by gibberellins. Plant Cell 16: 2641–2651**

Google Scholar: [Author Only](#) [Title Only](#) [Author and Title](#)

**Ishida S, Yuasa T, Nakata M, Takahashi Y (2008) A tobacco calcium-dependent protein kinase, CDPK1, regulates the transcription factor REPRESSION OF SHOOT GROWTH in response to gibberellins. Plant Cell 20: 3273–3288**

Google Scholar: [Author Only](#) [Title Only](#) [Author and Title](#)

**Ito T, Ishida S, Oe S, Fukazawa J, Takahashi Y (2017) Autophosphorylation affects substrate-binding affinity of tobacco Ca<sup>2+</sup>-dependent protein kinase1. Plant Physiol 174: 2457–2468**

Google Scholar: [Author Only](#) [Title Only](#) [Author and Title](#)

**Ito T, Nakata M, Fukazawa J, Ishida S, Takahashi Y (2014) Scaffold function of Ca<sup>2+</sup>-dependent protein kinase: tobacco Ca<sup>2+</sup>-DEPENDENT PROTEIN KINASE1 transfers 14-3-3 to the substrate REPRESSION OF SHOOT GROWTH after phosphorylation. Plant Physiol 165: 1737–1750**

Google Scholar: [Author Only](#) [Title Only](#) [Author and Title](#)

**Jaffe MJ (1973) Thigmomorphogenesis: The response of plant growth and development to mechanical stimulation : With special reference to Bryonia dioica. Planta 114: 143–157**

Google Scholar: [Author Only](#) [Title Only](#) [Author and Title](#)

**Jaffe MJ, Biro R, Bridle K (1980) Thigmomorphogenesis: Calibration of the parameters of the sensory function in beans. *Physiol Plant* 49: 410–416**

Google Scholar: [Author Only](#) [Title Only](#) [Author and Title](#)

**Jakoby M, Weisshaar B, Dröge-Laser W, Vicente-Carbajosa J, Tiedemann J, Kroj T, Parcy F, bZIP Research Group (2002) bZIP transcription factors in Arabidopsis. *Trends Plant Sci* 7: 106–111**

Google Scholar: [Author Only](#) [Title Only](#) [Author and Title](#)

**Katoh K, Rozewicki J, Yamada KD (2019) MAFFT online service: multiple sequence alignment, interactive sequence choice and visualization. *Brief Bioinform* 20: 1160–1166**

Google Scholar: [Author Only](#) [Title Only](#) [Author and Title](#)

**Kim D, Langmead B, Salzberg SL (2015) HISAT: a fast spliced aligner with low memory requirements. *Nat Methods* 12: 357**

Google Scholar: [Author Only](#) [Title Only](#) [Author and Title](#)

**Kim W-C, Ko J-H, Han K-H (2012) Identification of a cis-acting regulatory motif recognized by MYB46, a master transcriptional regulator of secondary wall biosynthesis. *Plant Mol Biol* 78: 489–501**

Google Scholar: [Author Only](#) [Title Only](#) [Author and Title](#)

**Leblanc-Fournier N, Martin L, Lenne C, Decourteix M (2014) To respond or not to respond, the recurring question in plant mechanosensitivity. *Front Plant Sci* 5: 401**

Google Scholar: [Author Only](#) [Title Only](#) [Author and Title](#)

**Lee D, Polisensky DH, Braam J (2005) Genome-wide identification of touch- and darkness-regulated Arabidopsis genes: a focus on calmodulin-like and XTH genes. *New Phytol* 165: 429–444**

Google Scholar: [Author Only](#) [Title Only](#) [Author and Title](#)

**Lee H-J, Kim H-S, Park JM, Cho HS, Jeon JH (2019) PIN-mediated polar auxin transport facilitates root obstacle avoidance. *New Phytol*. doi: 10.1111/nph.16076**

Google Scholar: [Author Only](#) [Title Only](#) [Author and Title](#)

**Lee TG, Jang CS, Kim JY, Kim DS, Park JH, Kim DY, Seo YW (2006) A Myb transcription factor (TaMyb1) from wheat roots is expressed during hypoxia: roles in response to the oxygen concentration in root environment and abiotic stresses. *Physiol Plant* 129: 375–385**

Google Scholar: [Author Only](#) [Title Only](#) [Author and Title](#)

**Li H, Handsaker B, Wysoker A, Fennell T, Ruan J, Homer N, Marth G, Abecasis G, Durbin R, 1000 Genome Project Data Processing Subgroup (2009) The Sequence Alignment/Map format and SAMtools. *Bioinformatics* 25: 2078–2079**

Google Scholar: [Author Only](#) [Title Only](#) [Author and Title](#)

**Liu R, Finlayson SA (2019) Sorghum tiller bud growth is repressed by contact with the overlying leaf. *Plant Cell Environ* 42: 2120–2132**

Google Scholar: [Author Only](#) [Title Only](#) [Author and Title](#)

**Liu X, Chu Z (2015) Genome-wide evolutionary characterization and analysis of bZIP transcription factors and their expression profiles in response to multiple abiotic stresses in Brachypodium distachyon. *BMC Genomics* 16: 227**

Google Scholar: [Author Only](#) [Title Only](#) [Author and Title](#)

**Lobet G, Pagès L, Draye X (2011) A novel image-analysis toolbox enabling quantitative analysis of root system architecture. *Plant Physiol* 157: 29–39**

Google Scholar: [Author Only](#) [Title Only](#) [Author and Title](#)

**Lourenço TF, Serra TS, Cordeiro AM, Swanson SJ, Gilroy S, Saibo NJM, Oliveira MM (2015) The Rice E3-Ubiquitin Ligase HIGH EXPRESSION OF OSMOTICALLY RESPONSIVE GENE1 Modulates the Expression of ROOT MEANDER CURLING, a Gene Involved in Root Mechanosensing, through the Interaction with Two ETHYLENE-RESPONSE FACTOR Transcription Factors. *Plant Physiol* 169: 2275–2287**

Google Scholar: [Author Only](#) [Title Only](#) [Author and Title](#)

**Love MI, Huber W, Anders S (2014) Moderated estimation of fold change and dispersion for RNA-seq data with DESeq2. *Genome Biol* 15: 550**

Google Scholar: [Author Only](#) [Title Only](#) [Author and Title](#)

**MacKinnon KJ-M, Cole BJ, Yu C, Coomey JH, Hartwick NT, Remigereau M-S, Duffy T, Michael TP, Kay SA, Hazen SP (2020) Changes in ambient temperature are the prevailing cue in determining Brachypodium distachyon diurnal gene regulation. *New Phytol* 227: 1649–1667**

Google Scholar: [Author Only](#) [Title Only](#) [Author and Title](#)

**Martin L, Leblanc-Fournier N, Julien J-L, Moulia B, Coutand C (2010) Acclimation kinetics of physiological and molecular responses of plants to multiple mechanical loadings. *J Exp Bot* 61: 2403–2412**

Google Scholar: [Author Only](#) [Title Only](#) [Author and Title](#)

**Matos DA, Whitney IP, Harrington MJ, Hazen SP (2013) Cell walls and the developmental anatomy of the *Brachypodium distachyon* stem internode. *PLoS One* 8: e80640**

Google Scholar: [Author Only](#) [Title Only](#) [Author and Title](#)

**McCahill IW, Hazen SP (2019) Regulation of cell wall thickening by a medley of mechanisms. *Trends Plant Sci* 24: 853–866**

Google Scholar: [Author Only](#) [Title Only](#) [Author and Title](#)

**Monshausen GB, Bibikova TN, Weisenseel MH, Gilroy S (2009) Ca<sup>2+</sup> regulates reactive oxygen species production and pH during mechanosensing in *Arabidopsis* roots. *Plant Cell* 21: 2341–2356**

Google Scholar: [Author Only](#) [Title Only](#) [Author and Title](#)

**Moore BM, Lee YS, Wang P, Azodi C, Grotewold E, Shiu S-H (2022) Modeling temporal and hormonal regulation of plant transcriptional response to wounding. *Plant Cell* 34: 867–888**

Google Scholar: [Author Only](#) [Title Only](#) [Author and Title](#)

**Moulija B, Coutand C, Julien J-L (2015) Mechanosensitive control of plant growth: bearing the load, sensing, transducing, and responding. *Front Plant Sci* 6: 52**

Google Scholar: [Author Only](#) [Title Only](#) [Author and Title](#)

**Nam BE, Park Y-J, Gil K-E, Kim J-H, Kim JG, Park C-M (2020) Auxin mediates the touch-induced mechanical stimulation of adventitious root formation under windy conditions in *Brachypodium distachyon*. *BMC Plant Biol* 20: 335**

Google Scholar: [Author Only](#) [Title Only](#) [Author and Title](#)

**Niez B, Dlouha J, Moulija B, Badel E (2019) Water-stressed or not, the mechanical acclimation is a priority requirement for trees. *Trees* 33: 279–291**

Google Scholar: [Author Only](#) [Title Only](#) [Author and Title](#)

**Ohtani M, Nishikubo N, Xu B, Yamaguchi M, Mitsuda N, Goué N, Shi F, Ohme-Takagi M, Demura T (2011) A NAC domain protein family contributing to the regulation of wood formation in poplar. *Plant J* 67: 499–512**

Google Scholar: [Author Only](#) [Title Only](#) [Author and Title](#)

**Olins JR, Lin L, Lee SJ, Trabucco GM, MacKinnon KJM, Hazen SP (2018) Secondary wall regulating NACs differentially bind at the promoter at a CELLULOSE SYNTHASE A4 cis-eQTL. *Front Plant Sci* 9: 1895**

Google Scholar: [Author Only](#) [Title Only](#) [Author and Title](#)

**Oliva M, Dunand C (2007) Waving and skewing: how gravity and the surface of growth media affect root development in *Arabidopsis*. *New Phytol* 176: 37–43**

Google Scholar: [Author Only](#) [Title Only](#) [Author and Title](#)

**O'Malley RC, Huang S-SC, Song L, Lewsey MG, Bartlett A, Nery JR, Galli M, Gallavotti A, Ecker JR (2016) Cistrome and epicistrome features shape the regulatory DNA landscape. *Cell* 165: 1280–1292**

Google Scholar: [Author Only](#) [Title Only](#) [Author and Title](#)

**Pertea M, Pertea GM, Antonescu CM, Chang T-C, Mendell JT, Salzberg SL (2015) StringTie enables improved reconstruction of a transcriptome from RNA-seq reads. *Nat Biotechnol* 33: 290–295**

Google Scholar: [Author Only](#) [Title Only](#) [Author and Title](#)

**Pitzschke A, Djamei A, Teige M, Hirt H (2009) VIP1 response elements mediate mitogen-activated protein kinase 3-induced stress gene expression. *Proc Natl Acad Sci U S A* 106: 18414–18419**

Google Scholar: [Author Only](#) [Title Only](#) [Author and Title](#)

**Polisensky DH, Braam J (1996) Cold-shock regulation of the *Arabidopsis* TCH genes and the effects of modulating intracellular calcium levels. *Plant Physiol* 111: 1271–1279**

Google Scholar: [Author Only](#) [Title Only](#) [Author and Title](#)

**Pomès L, Decourteix M, Franchel J, Moulija B, Leblanc-Fournier N (2017) Poplar stem transcriptome is massively remodelled in response to single or repeated mechanical stimuli. *BMC Genomics* 18: 300**

Google Scholar: [Author Only](#) [Title Only](#) [Author and Title](#)

**Raudvere U, Kolberg L, Kuzmin I, Arak T, Adler P, Peterson H, Vilo J (2019) g:Profiler: a web server for functional enrichment analysis and conversions of gene lists. *Nucleic Acids Res* 47: W191–W198**

Google Scholar: [Author Only](#) [Title Only](#) [Author and Title](#)

**Ringli C, Keller B (1998) Specific interaction of the tomato bZIP transcription factor VSF-1 with a non-palindromic DNA sequence that controls vascular gene expression. *Plant Mol Biol* 37: 977–988**

Google Scholar: [Author Only](#) [Title Only](#) [Author and Title](#)

**Roignant J, Badel É, Leblanc-Fournier N, Brunel-Michac N, Ruelle J, Moulija B, Decourteix M (2018) Feeling stretched or compressed? The multiple mechanosensitive responses of wood formation to bending. *Ann Bot* 121: 1151–1161**

Google Scholar: [Author Only](#) [Title Only](#) [Author and Title](#)

**Rushton PJ, Reinstädler A, Lipka V, Lippok B, Somssich IE (2002) Synthetic plant promoters containing defined regulatory elements provide novel insights into pathogen- and wound-induced signaling. *Plant Cell* 14: 749–762**

Google Scholar: [Author Only](#) [Title Only](#) [Author and Title](#)

**Schütze K, Harter K, Chaban C (2008) Post-translational regulation of plant bZIP factors. *Trends Plant Sci* 13: 247–255**

Google Scholar: [Author Only](#) [Title Only](#) [Author and Title](#)

**Shah L, Yahya M, Shah SMA, Nadeem M, Ali A, Ali A, Wang J, Riaz MW, Rehman S, Wu W, et al (2019) Improving lodging resistance: using wheat and rice as classical examples. *Int J Mol Sci*. doi: 10.3390/ijms20174211**

Google Scholar: [Author Only](#) [Title Only](#) [Author and Title](#)

**Sibout R, Proost S, Hansen BO, Vaid N, Giorgi FM, Ho-Yue-Kuang S, Legée F, Cézart L, Bouchabké-Coussa O, Soulhat C, et al (2017) Expression atlas and comparative coexpression network analyses reveal important genes involved in the formation of lignified cell wall in *Brachypodium distachyon*. *New Phytol* 215: 1009–1025**

Google Scholar: [Author Only](#) [Title Only](#) [Author and Title](#)

**Swanson SJ, Barker R, Ye Y, Gilroy S (2015) Evaluating mechano-transduction and touch responses in plant roots. *Methods Mol Biol* 1309: 143–150**

Google Scholar: [Author Only](#) [Title Only](#) [Author and Title](#)

**Szczegieliński J, Borkiewicz L, Szurmak B, Lewandowska-Gnatowska E, Statkiewicz M, Klimecka M, Cieśla J, Muszyńska G (2012) Maize calcium-dependent protein kinase (ZmCPK11): local and systemic response to wounding, regulation by touch and components of jasmonate signaling. *Physiol Plant* 146: 1–14**

Google Scholar: [Author Only](#) [Title Only](#) [Author and Title](#)

**Trabucco GM, Matos DA, Lee SJ, Saathoff A, Priest H, Mockler TC, Sarath G, Hazen SP (2013) Functional characterization of cinnamyl alcohol dehydrogenase and caffeic acid O-methyltransferase in *Brachypodium distachyon*. *BMC Biotechnol* 13: 61**

Google Scholar: [Author Only](#) [Title Only](#) [Author and Title](#)

**Trifinopoulos J, Nguyen L-T, von Haeseler A, Minh BQ (2016) W-IQ-TREE: a fast online phylogenetic tool for maximum likelihood analysis. *Nucleic Acids Res* 44: W232–W235**

Google Scholar: [Author Only](#) [Title Only](#) [Author and Title](#)

**Tsugama D, Liu S, Fujino K, Takano T (2018) Calcium signalling regulates the functions of the bZIP protein VIP1 in touch responses in *Arabidopsis thaliana*. *Ann Bot* 122: 1219–1229**

Google Scholar: [Author Only](#) [Title Only](#) [Author and Title](#)

**Tsugama D, Liu S, Takano T (2012) A bZIP protein, VIP1, is a regulator of osmosensory signaling in *Arabidopsis*. *Plant Physiol* 159: 144–155**

Google Scholar: [Author Only](#) [Title Only](#) [Author and Title](#)

**Tsugama D, Liu S, Takano T (2016) The bZIP protein VIP1 is involved in touch responses in *Arabidopsis* roots. *Plant Physiol* 171: 1355–1365**

Google Scholar: [Author Only](#) [Title Only](#) [Author and Title](#)

**Tsugama D, Liu S, Takano T (2014) Analysis of functions of VIP1 and its close homologs in osmosensory responses of *Arabidopsis thaliana*. *PLoS One* 9: e103930**

Google Scholar: [Author Only](#) [Title Only](#) [Author and Title](#)

**Tyler L, Bragg JN, Wu J, Yang X, Tuskan GA, Vogel JP (2010) Annotation and comparative analysis of the glycoside hydrolase genes in *Brachypodium distachyon*. *BMC Genomics* 11: 600**

Google Scholar: [Author Only](#) [Title Only](#) [Author and Title](#)

**Uyttewaal M, Burian A, Alim K, Landrein B, Borowska-Wykręt D, Dedieu A, Peaucelle A, Ludynia M, Traas J, Boudaoud A, et al (2012) Mechanical stress acts via katanin to amplify differences in growth rate between adjacent cells in *Arabidopsis*. *Cell* 149: 439–451**

Google Scholar: [Author Only](#) [Title Only](#) [Author and Title](#)

**Valdivia ER, Herrera MT, Gianzo C, Fidalgo J, Revilla G, Zarra I, Sampedro J (2013) Regulation of secondary wall synthesis and cell death by NAC transcription factors in the monocot *Brachypodium distachyon*. *J Exp Bot* 64: 1333–1343**

Google Scholar: [Author Only](#) [Title Only](#) [Author and Title](#)

**Van Leene J, Blomme J, Kulkarni SR, Cannoot B, De Winne N, Eeckhout D, Persiau G, Van De Slijke E, Vercruyse L, Vanden Bossche R, et al (2016) Functional characterization of the *Arabidopsis* transcription factor bZIP29 reveals its role in leaf and root development. *J Exp Bot* 67: 5825–5840**

Google Scholar: [Author Only](#) [Title Only](#) [Author and Title](#)

**Van Moerkercke A, Duncan O, Zander M, Šimura J, Broda M, Vanden Bossche R, Lewsey MG, Lama S, Singh KB, Ljung K, et al (2019) A MYC2/MYC3/MYC4-dependent transcription factor network regulates water spray-responsive gene expression and jasmonate levels. *Proc Natl Acad Sci U S A* 116: 23345–23356**

Google Scholar: [Author Only](#) [Title Only](#) [Author and Title](#)

**Walley J, Coughlan S, Hudson ME, Covington MF, Kaspi R, Banu G, Harmer SL, Dehesh K (2007) Mechanical stress induces biotic and abiotic stress responses via a novel cis-element. PLoS Genet 3: 1800–1812**

Google Scholar: [Author Only](#) [Title Only](#) [Author and Title](#)

**Weltmeier F, Ehlert A, Mayer CS, Dietrich K, Wang X, Schütze K, Alonso R, Harter K, Vicente-Carbajosa J, Dröge-Laser W (2006) Combinatorial control of Arabidopsis proline dehydrogenase transcription by specific heterodimerisation of bZIP transcription factors. EMBO J 25: 3133–3143**

Google Scholar: [Author Only](#) [Title Only](#) [Author and Title](#)

**Yin Y, Zhu Q, Dai S, Lamb C, Beachy RN (1997) RF2a, a bZIP transcriptional activator of the phloem-specific rice tungro bacilliform virus promoter, functions in vascular development. EMBO J 16: 5247–5259**

Google Scholar: [Author Only](#) [Title Only](#) [Author and Title](#)

**Zha G, Wang B, Liu J, Yan J, Zhu L, Yang X (2016) Mechanical touch responses of Arabidopsis TCH1-3 mutant roots on inclined hard-agar surface. International Agrophysics 30: 65**

Google Scholar: [Author Only](#) [Title Only](#) [Author and Title](#)

**Zhong R, Lee C, McCarthy RL, Reeves CK, Jones EG, Ye Z-H (2011) Transcriptional activation of secondary wall biosynthesis by rice and maize NAC and MYB transcription factors. Plant Cell Physiol 52: 1856–1871**

Google Scholar: [Author Only](#) [Title Only](#) [Author and Title](#)

**Zhong R, Ye Z-H (2012) MYB46 and MYB83 bind to the SMRE sites and directly activate a suite of transcription factors and secondary wall biosynthetic genes. Plant Cell Physiol 53: 368–380**

Google Scholar: [Author Only](#) [Title Only](#) [Author and Title](#)
